# Supplementary material for: Can anions possess bound doubly-excited electronic states?
Source: Royal Society of Chemistry journal article supplement (doi:10.1039/d3sc00370a), 2023-01-01
Supplement: d3sc00370a1.pdf [file d3sc00370a1.pdf]

# Supplementary Information of Can anions possess bound doubly-excited electronic states?

Shi-Jie Hou<sup>1</sup>, Yi-Fan Yang<sup>2\*</sup>, Zhong-Hua Cui<sup>1†</sup>, and Lorenz S. Cederbaum<sup>3‡</sup>

<sup>1</sup>*Institute of Atomic and Molecular Physics, Jilin University, Changchun 130023, China*

<sup>2</sup>*Quantum Theory Project, Departments of Physics and Chemistry, University of Florida, Gainesville, Florida 32611, USA*

<sup>3</sup>*Theoretical Chemistry, Institute of Physical Chemistry, Im Neuenheimer Feld 229, Universität Heidelberg, D-69120 Heidelberg, Germany*

---

\* corresponding author: yang.yifan@ufl.edu

† corresponding author: zcui@jlu.edu.cn

‡ corresponding author: Lorenz.Cederbaum@pci.uni-heidelberg.de

## Table of Content

|                                                                                                                                            |    |
|--------------------------------------------------------------------------------------------------------------------------------------------|----|
| S1. Smallest endocircular carbon ring system .....                                                                                         | 3  |
| S2. The optimized geometries of the ground and doubly-excited states of $\text{Li}@C_{12}^-$ .....                                         | 9  |
| S3. Vibrational frequencies of the ground and doubly-excited state of $\text{Li}@C_{12}^-$ .....                                           | 10 |
| S4. Full picture of the excited states of $\text{Li}@C_{12}^-$ .....                                                                       | 12 |
| S5. The optimization of the geometries of the ground and doubly-excited states of the endohedral fullerene $\text{Li}@C_{20}^-$ anion..... | 18 |
| S6. Vibrational frequency calculation for the ground state of $\text{Li}@C_{20}^-$ .....                                                   | 23 |
| S7. The full picture of the excited states of $\text{Li}@C_{20}^-$ .....                                                                   | 24 |
| S8. Potential energy surface scan of low-lying closed-shell states of $\text{Li}@C_{12}^-$ .....                                           | 29 |
| S9. CASSCF calculations on the ground and excited states of $\text{Li}@C_{12}^-$ in $C_{2v}$ symmetry .....                                | 59 |
| References.....                                                                                                                            | 61 |

## S1. Smallest endocircular carbon ring system

Monocyclic carbon rings  $C_n$  ( $10 < n < 20$ ) are abundant in ion chromatography experiments. Beyond  $C_{20}$ , monocyclic carbon rings are no longer energy favored. [1-3] Thus, an endocircular system formed by  $C_{10}$  is expected to be the smallest endocircular system.

We have performed all-electron CCSD<sup>[4]</sup> calculations with cc-pVTZ<sup>[5,6]</sup> basis set on the cationic  $Li^+@C_{10}$  and  $Li^+@C_{11}$  as well as EOM-EA-CCSD<sup>[7]</sup> method on the neutral  $Li@C_{10}$  and  $Li@C_{11}$  systems, as implemented in the CFOUR program package.<sup>[8]</sup> In the following we discuss the results for the cationic systems. We shall see that the ring cannot accommodate the Li guest in the plane and one needs a  $C_{12}$  ring to achieve this goal.

The structures and cartesian coordinates of the equilibrium geometries of the ground state of cationic and neutral  $Li@C_{10}$  and  $Li@C_{11}$ , are shown in Figure S1 and Table S1, respectively. To test the stability of these structures, we calculated their vibrational frequencies and the results are shown in Table S2. Planar  $Li^+@C_{10}$  (structure a) and planar  $Li^+@C_{11}$  (structure b) are unstable with imaginary frequencies of the out-of-plane vibrational mode. The vibrational pattern and amplitudes of the  $Li^+$  cation and C atoms are depicted in different colors in Figure S1.

Our calculations on the respective neutrals show that the carbon rings  $C_{10}$  and  $C_{11}$  cannot accommodate the guest atom Li either, i.e., similar to their cationic counterparts, imaginary frequencies for out of plane modes appear. Thus,  $C_{10}$  and  $C_{11}$  cannot form endocircular carbon ring systems with a Li guest atom. As we have already demonstrated before,<sup>[9]</sup> neutral  $Li@C_{12}$  is an endocircular system. It is the smallest endocircular Li system.

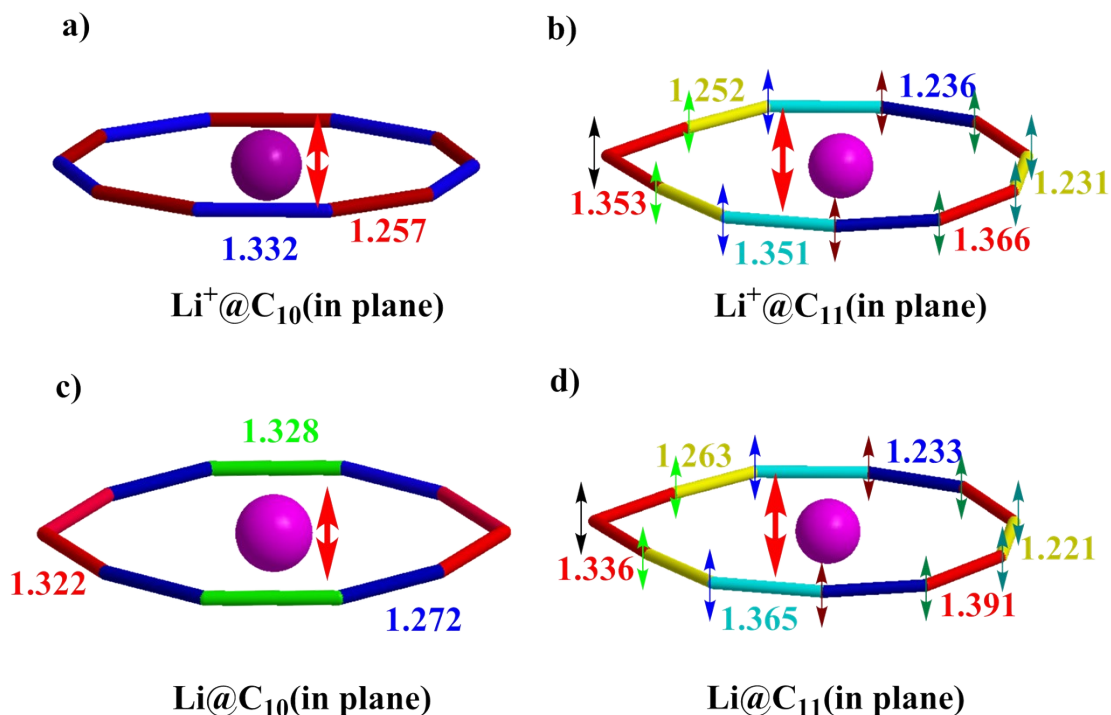

**Figure S1.** The geometry and the mode with the imaginary vibrational frequency of the ground state of the cationic  $\text{Li}^+@C_{10}$  and  $\text{Li}^+@C_{11}$  calculated at CCSD/ cc-pVTZ level, and of the neutral  $\text{Li}@C_{10}$  and  $\text{Li}@C_{11}$  calculated at EA-EOM-CCSD/cc-pVTZ level. a) Imaginary vibrational mode of  $\text{Li}^+@C_{10}$ . b) Imaginary vibrational mode of  $\text{Li}^+@C_{11}$ . c) Imaginary vibrational mode of neutral  $\text{Li}@C_{10}$ . d) Imaginary vibrational mode of neutral  $\text{Li}@C_{11}$ . The bold red bidirectional arrows indicate the vibrational pattern of the  $\text{Li}^+$  cation. The bidirectional arrows in different colors indicate the vibrational pattern and amplitudes of the different C atoms. The bond lengths are shown in different colors. The units are Å.

**Table S1. Cartesian coordinates of cationic Li<sup>+</sup>@C<sub>10</sub> and Li<sup>+</sup>@C<sub>11</sub> (optimized at CCSD/cc-pVTZ level) and neutral Li@C<sub>10</sub> and Li@C<sub>11</sub> (optimized at EA-EOM-CCSD level). Unit is Å.**

|             |             |             |             |             |
|-------------|-------------|-------------|-------------|-------------|
| Structure a | Li          | 0.0000000   | 0.0000000   | 0.0000000   |
|             | C           | 0.0000000   | -0.66607055 | 1.98562805  |
|             | C           | 0.0000000   | -1.68261737 | 1.24706355  |
|             | C           | 0.0000000   | -2.09427162 | -0.01987793 |
|             | C           | 0.0000000   | -1.70598528 | -1.21490039 |
|             | C           | 0.0000000   | -0.62826049 | -1.99791328 |
|             | C           | 0.0000000   | 0.62826049  | -1.99791328 |
|             | C           | 0.0000000   | 1.70598528  | -1.21490039 |
|             | C           | 0.0000000   | 2.09427162  | -0.01987793 |
|             | C           | 0.0000000   | 1.68261737  | 1.24706355  |
|             | C           | 0.0000000   | 0.66607055  | 1.98562805  |
|             | Structure b | Li          | 0.0000000   | 0.0000000   |
| C           |             | 0.0000000   | 0.0000000   | 2.66406007  |
| C           |             | -1.09284487 | 0.0000000   | 1.86624842  |
| C           |             | 1.09284487  | 0.0000000   | 1.86624842  |
| C           |             | -1.99136123 | 0.0000000   | 0.99386791  |
| C           |             | 1.99136123  | 0.0000000   | 0.99386791  |
| C           |             | -2.13224694 | 0.0000000   | -0.34948348 |
| C           |             | 2.13224694  | 0.0000000   | -0.34948348 |
| C           |             | -1.75487998 | 0.0000000   | -1.52604827 |
| C           |             | 1.75487998  | 0.0000000   | -1.52604827 |
| C           |             | -0.61535059 | 0.0000000   | -2.27891458 |
| C           |             | 0.61535059  | 0.0000000   | -2.27891458 |
| Structure c | Li          | 0.0000000   | 0.0000000   | 0.0000000   |
|             | C           | 1.66543862  | -1.16613877 | 0.0000000   |
|             | C           | -1.66543862 | 1.16613877  | 0.0000000   |
|             | C           | 0.66403886  | -1.95109931 | 0.0000000   |
|             | C           | -0.66403886 | 1.95109931  | 0.0000000   |
|             | C           | -0.66405165 | -1.95109252 | 0.0000000   |
|             | C           | 0.66405165  | 1.95109252  | 0.0000000   |
|             | C           | -1.66544949 | -1.16613003 | 0.0000000   |
|             | C           | 1.66544949  | 1.16613003  | 0.0000000   |
|             | C           | -2.28895199 | 0.00000811  | 0.0000000   |
|             | C           | 2.28895199  | -0.00000811 | 0.0000000   |

**Table S1 (continued)**

|             |    |             |            |             |
|-------------|----|-------------|------------|-------------|
| Structure d | Li | 0.00000000  | 0.00000000 | -0.09523949 |
|             | C  | 0.00000000  | 0.00000000 | 2.54838732  |
|             | C  | -1.12632608 | 0.00000000 | 1.83046181  |
|             | C  | 1.12632608  | 0.00000000 | 1.83046181  |
|             | C  | -2.09860997 | 0.00000000 | 1.02385803  |
|             | C  | 2.09860997  | 0.00000000 | 1.02385803  |
|             | C  | -2.14841500 | 0.00000000 | -0.33977898 |
|             | C  | 2.14841500  | 0.00000000 | -0.33977898 |
|             | C  | -1.80463391 | 0.00000000 | -1.52369207 |
|             | C  | 1.80463391  | 0.00000000 | -1.52369207 |
|             | C  | -0.61069345 | 0.00000000 | -2.23720076 |
|             | C  | 0.61069345  | 0.00000000 | -2.23720076 |

**Table S2. Vibrational frequencies of equilibrium geometries of planar Li@C<sub>10</sub> and Li@C<sub>11</sub>. All the results are obtained at CCSD/cc-pVTZ level and EOM-EA-CCSD/cc-pVTZ level. Imaginary frequencies are marked in bold. All units are in cm<sup>-1</sup>.**

| Structure a |                  | Structure b |                  | Structure c |                  | Structure d |                 |
|-------------|------------------|-------------|------------------|-------------|------------------|-------------|-----------------|
| <b>A2''</b> | <b>241.3214i</b> | <b>B2</b>   | <b>120.6297i</b> | <b>Au</b>   | <b>211.3005i</b> | <b>B2</b>   | <b>35.6451i</b> |
| E2''        | 250.1526         | A1          | 144.0747         | Bu          | 201.8806         | A1          | 84.0932         |
| E2''        | 250.1526         | B2          | 175.7816         | Au          | 222.572          | B1          | 131.6365        |
| E2'         | 320.5103         | B1          | 197.3691         | Ag          | 233.3317         | B1          | 152.1666        |
| E2'         | 320.5103         | A2          | 203.2581         | Au          | 254.6078         | B2          | 153.3958        |
| A2'         | 475.4419         | B2          | 302.2791         | Ag          | 289.3448         | A2          | 172.6346        |
| A1''        | 476.0806         | A1          | 304.8172         | Bu          | 298.4508         | A1          | 269.5218        |
| E2''        | 477.1978         | B1          | 312.355          | Bg          | 375.9979         | B2          | 314.0761        |
| E2''        | 477.1978         | A1          | 368.2226         | Ag          | 409.2198         | A1          | 356.4493        |
| E2'         | 526.9812         | A2          | 429.4564         | Au          | 437.9675         | A2          | 433.6743        |
| E2'         | 526.9812         | B1          | 456.7691         | Bg          | 447.2467         | B1          | 444.3491        |
| E1''        | 560.5355         | B2          | 461.0901         | Bu          | 488.9742         | B2          | 449.1410        |
| E1''        | 560.5355         | A1          | 490.7184         | Bg          | 503.2058         | B1          | 479.8048        |
| E1'         | 561.1208         | B1          | 500.2396         | Au          | 542.7519         | A2          | 490.0451        |
| E1'         | 561.1208         | B1          | 521.1024         | Bu          | 596.9362         | B2          | 501.2349        |
| E1'         | 628.1991         | A2          | 587.4584         | Bu          | 633.5903         | A1          | 505.8183        |
| E1'         | 628.1991         | B2          | 591.0721         | Ag          | 655.3521         | B1          | 522.6375        |
| A1'         | 656.9704         | A2          | 608.8008         | Bu          | 803.9805         | A2          | 531.0911        |
| E1'         | 1034.8709        | A1          | 611.1624         | Ag          | 808.3602         | A1          | 636.4751        |
| E1'         | 1034.8709        | A1          | 754.8216         | Bu          | 1028.1439        | A1          | 769.8327        |
| A1'         | 1124.6304        | B1          | 873.606          | Bu          | 1105.644         | B1          | 879.3564        |
| E2'         | 1452.5541        | A1          | 935.5626         | Ag          | 1392.5964        | A1          | 921.8256        |
| E2'         | 1452.5541        | B1          | 1234.7092        | Ag          | 1411.5197        | B1          | 1223.8602       |

**Table S2. (continued)**

|     |           |    |           |    |           |    |           |
|-----|-----------|----|-----------|----|-----------|----|-----------|
| E2' | 1977.4017 | A1 | 1294.5207 | Bu | 1713.5426 | A1 | 1268.3915 |
| E2' | 1977.4017 | B1 | 1452.2884 | Ag | 1930.2422 | B1 | 1381.2019 |
| E1' | 2096.9363 | B1 | 1818.3661 | Bu | 1937.9044 | B1 | 1579.1442 |
| E1' | 2096.9363 | A1 | 1872.085  | Ag | 2075.0804 | A1 | 1937.4052 |
|     |           | A1 | 2019.9333 |    |           | A1 | 2071.0741 |
|     |           | B1 | 2113.745  |    |           | B1 | 2098.0321 |
|     |           | A1 | 2126.1177 |    |           | A1 | 2202.9364 |



## S2. The optimized geometries of the ground and doubly-excited states

### of Li@C<sub>12</sub><sup>-</sup>

The cartesian coordinates of the optimized geometry of the ground and doubly-excited states of Li@C<sub>12</sub><sup>-</sup> are shown in Table S3. The numbers of occupied orbitals in different irreducible representations are also listed.

**Table S3. Cartesian coordinates of the ground and doubly-excited states of Li@C<sub>12</sub><sup>-</sup> optimized at CCSD/ cc-pVTZ level. The orbital compositions are in brackets. Unit is Å.**

|                                                                                                                                                                      |                                                                                                                                                                                                                                                                     |              |              |              |
|----------------------------------------------------------------------------------------------------------------------------------------------------------------------|---------------------------------------------------------------------------------------------------------------------------------------------------------------------------------------------------------------------------------------------------------------------|--------------|--------------|--------------|
| Li@C <sub>12</sub> <sup>-</sup><br>(the ground state)<br><br>C <sub>2v</sub> symmetry<br>(18 a <sub>1</sub> +4 b <sub>1</sub> +14 b <sub>2</sub> +2 a <sub>2</sub> ) | Li                                                                                                                                                                                                                                                                  | 0.00000000   | 0.00000000   | -0.010498728 |
|                                                                                                                                                                      | C                                                                                                                                                                                                                                                                   | 0.00000000   | 0.650394151  | 2.029406450  |
|                                                                                                                                                                      | C                                                                                                                                                                                                                                                                   | 0.00000000   | -0.650394151 | 2.029406450  |
|                                                                                                                                                                      | C                                                                                                                                                                                                                                                                   | 0.00000000   | 1.830109074  | 1.503931838  |
|                                                                                                                                                                      | C                                                                                                                                                                                                                                                                   | 0.00000000   | -1.830109074 | 1.503931838  |
|                                                                                                                                                                      | C                                                                                                                                                                                                                                                                   | 0.00000000   | 2.935957442  | 0.791452808  |
|                                                                                                                                                                      | C                                                                                                                                                                                                                                                                   | 0.00000000   | -2.935957442 | 0.791452808  |
|                                                                                                                                                                      | C                                                                                                                                                                                                                                                                   | 0.00000000   | 2.479402796  | -0.542350916 |
|                                                                                                                                                                      | C                                                                                                                                                                                                                                                                   | 0.00000000   | -2.479402796 | -0.542350916 |
|                                                                                                                                                                      | C                                                                                                                                                                                                                                                                   | 0.00000000   | 1.899190222  | -1.628731757 |
|                                                                                                                                                                      | C                                                                                                                                                                                                                                                                   | 0.00000000   | -1.899190222 | -1.628731757 |
|                                                                                                                                                                      | C                                                                                                                                                                                                                                                                   | 0.00000000   | 0.608854335  | -2.150639296 |
|                                                                                                                                                                      | C                                                                                                                                                                                                                                                                   | 0.00000000   | -0.608854335 | -2.150639296 |
|                                                                                                                                                                      | cumulenic Li@C <sub>12</sub> <sup>-</sup><br>(the doubly-excited state)<br><br>D <sub>6h</sub> symmetry<br>(10 a <sub>g</sub> +7 b <sub>3u</sub> +8 b <sub>2u</sub> +6 b <sub>1g</sub> +2 b <sub>1u</sub> +2 b <sub>3g</sub> +2 b <sub>2g</sub> +1 a <sub>u</sub> ) | Li           | 0.00000000   | 0.00000000   |
| C                                                                                                                                                                    |                                                                                                                                                                                                                                                                     | 1.891925904  | -1.746199592 | 0.00000000   |
| C                                                                                                                                                                    |                                                                                                                                                                                                                                                                     | 2.321481710  | -0.523433533 | 0.00000000   |
| C                                                                                                                                                                    |                                                                                                                                                                                                                                                                     | 2.458216158  | 0.765356099  | 0.00000000   |
| C                                                                                                                                                                    |                                                                                                                                                                                                                                                                     | 1.614047591  | 1.748745374  | 0.00000000   |
| C                                                                                                                                                                    |                                                                                                                                                                                                                                                                     | 0.566290254  | 2.511555690  | 0.00000000   |
| C                                                                                                                                                                    |                                                                                                                                                                                                                                                                     | -0.707434119 | 2.272178901  | 0.00000000   |
| C                                                                                                                                                                    |                                                                                                                                                                                                                                                                     | -1.891925904 | 1.746199592  | 0.00000000   |
| C                                                                                                                                                                    |                                                                                                                                                                                                                                                                     | -2.321481710 | 0.523433533  | 0.00000000   |
| C                                                                                                                                                                    |                                                                                                                                                                                                                                                                     | -2.458216158 | -0.765356099 | 0.00000000   |
| C                                                                                                                                                                    |                                                                                                                                                                                                                                                                     | -1.614047591 | -1.748745374 | 0.00000000   |
| C                                                                                                                                                                    |                                                                                                                                                                                                                                                                     | -0.566290254 | -2.511555690 | 0.00000000   |
| C                                                                                                                                                                    |                                                                                                                                                                                                                                                                     | 0.707434119  | -2.272178901 | 0.00000000   |

### S3. Vibrational frequencies of the ground and doubly-excited state of

#### Li@C<sub>12</sub><sup>-</sup>.

We calculated the vibrational frequencies of the ground and doubly-excited states of Li@C<sub>12</sub><sup>-</sup> at CCSD/cc-pVTZ level. The results are shown in Table S4. All the frequencies are real showing that the found geometries provide minima on the energy surfaces. Due to technical difficulties, the vibrational frequency calculation of the doubly-excited state is carried out using C<sub>6h</sub> symmetry (a subgroup of D<sub>6h</sub>).

**Table S4. Vibrational frequencies of the ground and doubly-excited states of Li@C<sub>12</sub><sup>-</sup>. The frequencies are obtained at CCSD/cc-pVTZ level. All units are in cm<sup>-1</sup>.**

| Ground state |          | Doubly-excited state |          |
|--------------|----------|----------------------|----------|
| B2           | 84.7409  | E2                   | 46.0467  |
| B1           | 141.4263 | E2                   | 46.0467  |
| A2           | 153.1312 | Au                   | 96.1946  |
| B1           | 165.2181 | Bu                   | 97.2873  |
| A1           | 184.7483 | E2                   | 147.258  |
| B2           | 219.3191 | E2                   | 147.258  |
| A1           | 249.5153 | E1                   | 200.2374 |
| A2           | 298.8611 | E1                   | 200.2374 |
| B1           | 324.038  | E1                   | 249.0257 |
| B2           | 330.08   | E1                   | 249.0257 |
| A1           | 443.5852 | Bg                   | 291.5184 |
| B1           | 479.8243 | Bg                   | 292.5397 |
| B2           | 488.525  | E2                   | 325.1516 |
| A1           | 497.7203 | E2                   | 325.1516 |

**Table S4 (continued)**

|    |           |    |           |
|----|-----------|----|-----------|
| A2 | 502.755   | Au | 378.136   |
| B1 | 515.6978  | Bu | 486.5221  |
| B2 | 531.0802  | E2 | 549.4093  |
| A1 | 572.6854  | E2 | 549.4093  |
| B2 | 594.4799  | E1 | 572.7357  |
| A2 | 601.3577  | E1 | 572.7357  |
| A2 | 655.4695  | Ag | 608.2976  |
| A1 | 701.2344  | Ag | 784.1208  |
| A1 | 769.8889  | Ag | 870.3654  |
| B2 | 872.3695  | E1 | 906.4482  |
| A1 | 1089.2567 | E1 | 906.4482  |
| B2 | 1194.2775 | E2 | 1308.9311 |
| B2 | 1314.0282 | E2 | 1308.9311 |
| A1 | 1625.2714 | Bu | 1619.073  |
| B2 | 1902.1402 | Bu | 1790.5976 |
| A1 | 2083.1101 | E1 | 1793.842  |
| A1 | 2095.8843 | E1 | 1793.842  |
| B2 | 2098.7795 | E2 | 1982.068  |
| A1 | 2288.7392 | E2 | 1982.068  |

## S4. Full picture of the excited states of $\text{Li@C}_{12}^-$

Due to limitations of text space, only the low-lying excited states which are bound are shown in Figure 2 of the main text. Here, we show in Figure S2 the full picture of all the triplet singly-excited states, which we found at EE-EOM-CCSD/cc-pVTZ level. The corresponding singly-excited singlet states are shown in Figure S3. The energies and irreducible representations of frontier Hartree-Fock (HF) orbitals of the ground state are shown in Table S5. These HF orbitals play the role of initial and final orbitals of singly-excited states. The three low-lying triplet states are formed by exciting one electron from the HOMO, HOMO-1 and HOMO-2 to LUMO, respectively. The fourth singly-excited triplet state is formed by exciting one electron from HOMO-1 to a virtual orbital higher than LUMO.

The non-charge-separated excited states are not low-lying and they are all higher in energy than the neutral  $\text{Li@C}_{12}$ . The non-charge-separated state with lowest energy in Figure S2(b) is  $2^3B_1$  (3.62 eV higher than the ground state). The next two non-charge-separated states, i.e.,  $4^3A_2$  and  $4^3A_1$ , also possess relative high energies (3.77 eV and 4.09 eV). It is noteworthy that the non-charged-electron states of neutral of  $\text{Li@C}_n$  are low-lying states.<sup>[9]</sup>

As shown in Figure S3, all the singly-excited singlet states are higher in energy than their triplet counterparts (in Figure S2) and the doubly-excited state (in its equilibrium geometry). The three lowest singlet singly-excited states are the counterparts of the three lowest triplet states. There is a moderately large energy gap between valence singly-excited singlet states and their triplet counterparts, e.g.,  $\sim 1$  eV ( $1^3B_1$  and  $1^1B_1$ ). In contrast, the gaps between non-charge-separated singlet and triplet states are much smaller, e.g.,  $\sim 0.1$  eV ( $2^3B_1$  and  $2^1B_1$ ).

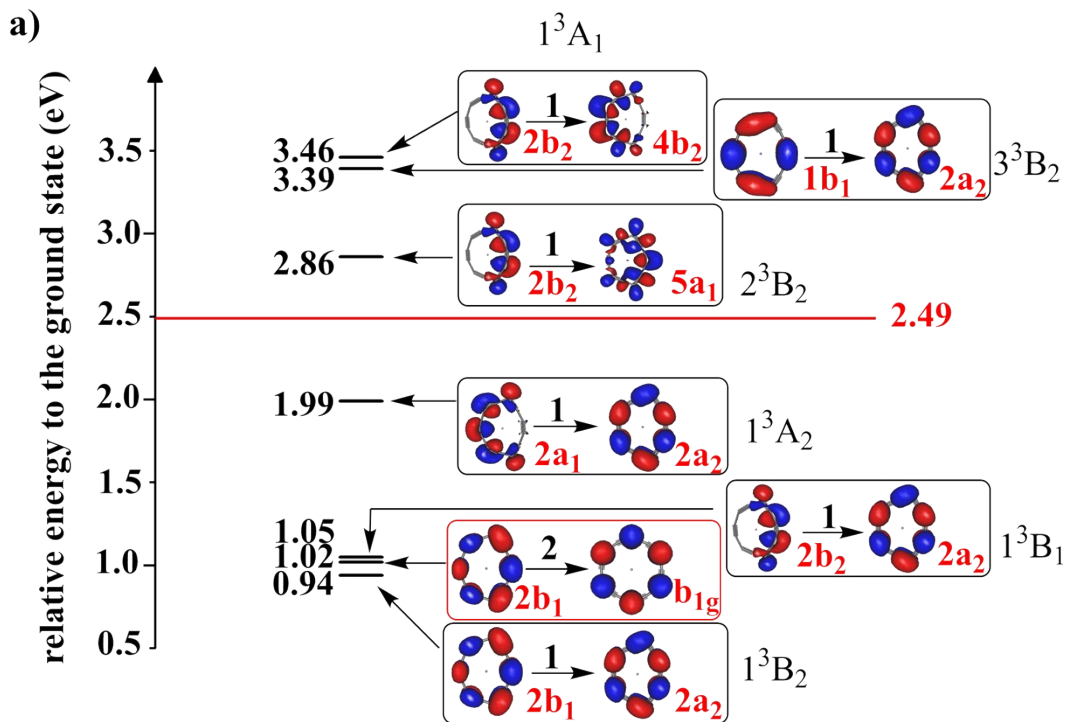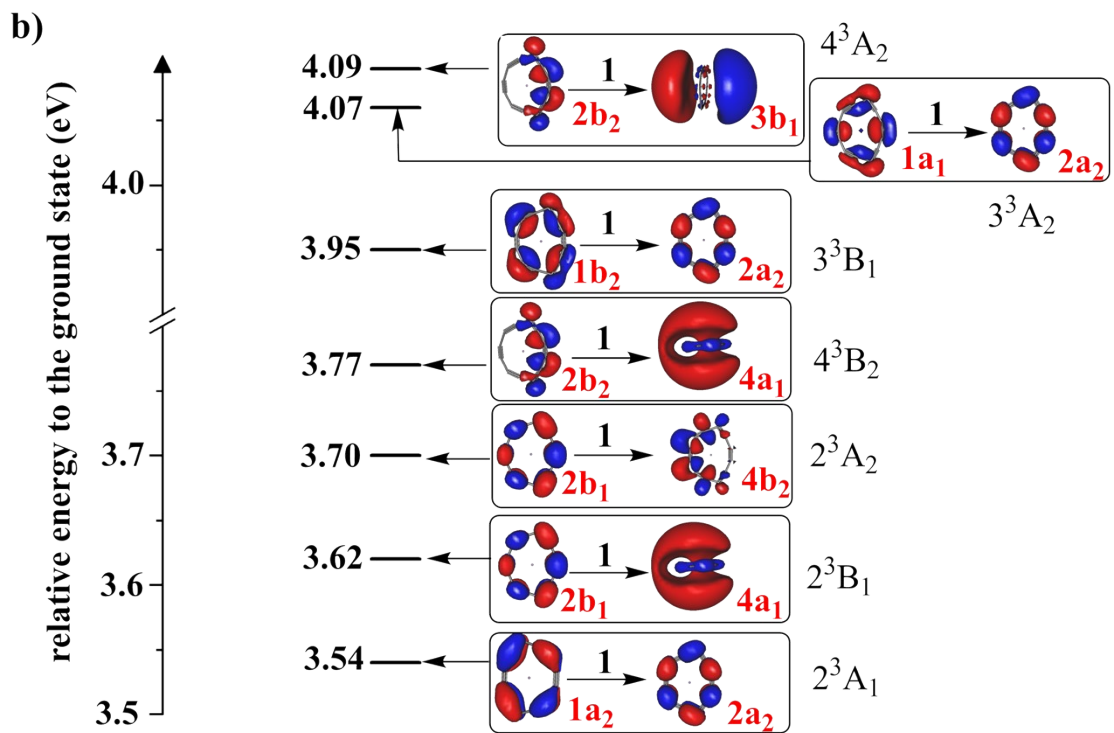

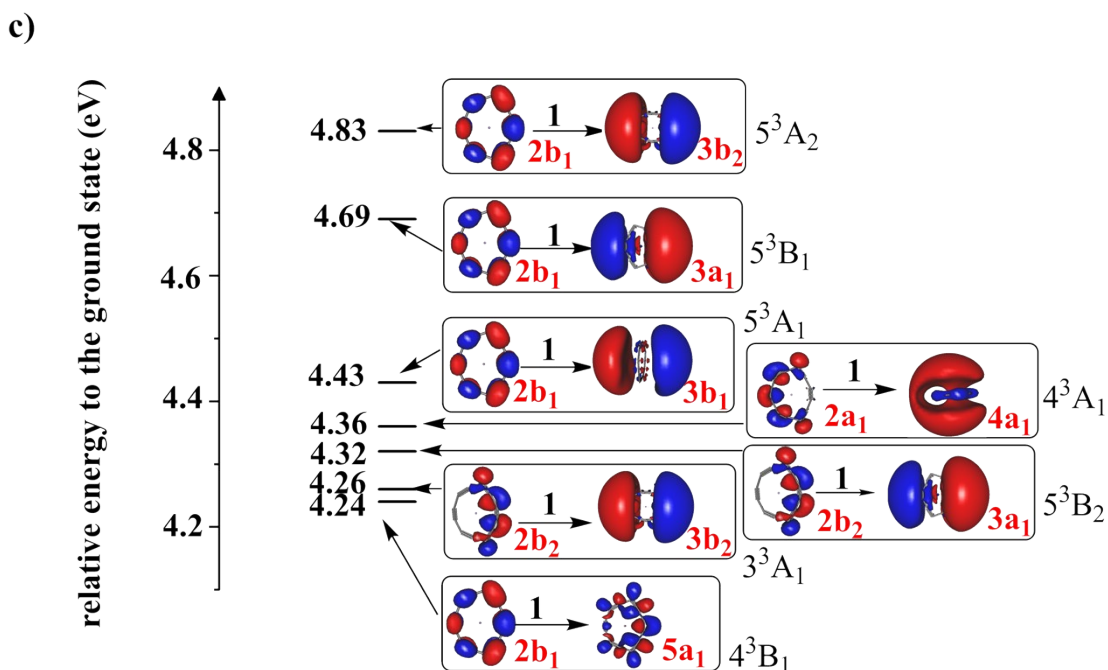

**Figure S2.** The energies of the singly-excited triplet states of  $\text{Li@C}_{12}^-$  relative to that of its global ground state. The states in black and red blocks are singly-excited triplet and doubly-excited singlet states, respectively. The doubly-occupied HOMO of the doubly-excited state and the singly-occupied orbitals of the singly-excited states are shown.

a) The excited states with a relative energy to the ground state between 0.5 and 3.5 eV. b) The excited states with relative energy to ground state between 3.5 and 4.1 eV. c) The excited states with a relative energy to the ground state between 4.1 and 4.9 eV. The energies of the singly-excited states are vertical excitation energies based on the equilibrium geometry of the anion in its ground state. The energy of the doubly-excited is obtained at its own optimized equilibrium geometry.

a)

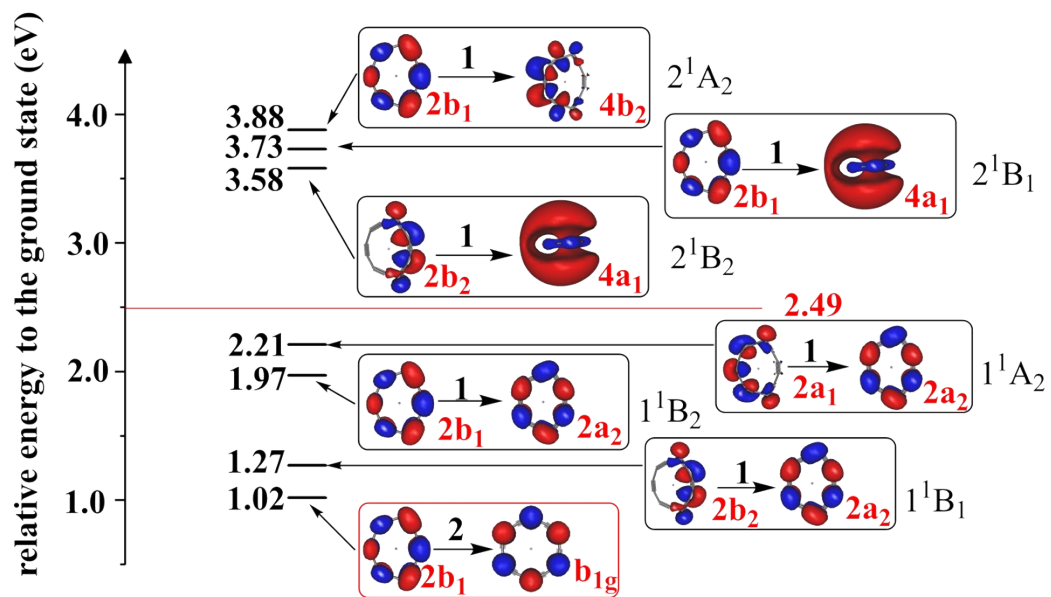

b)

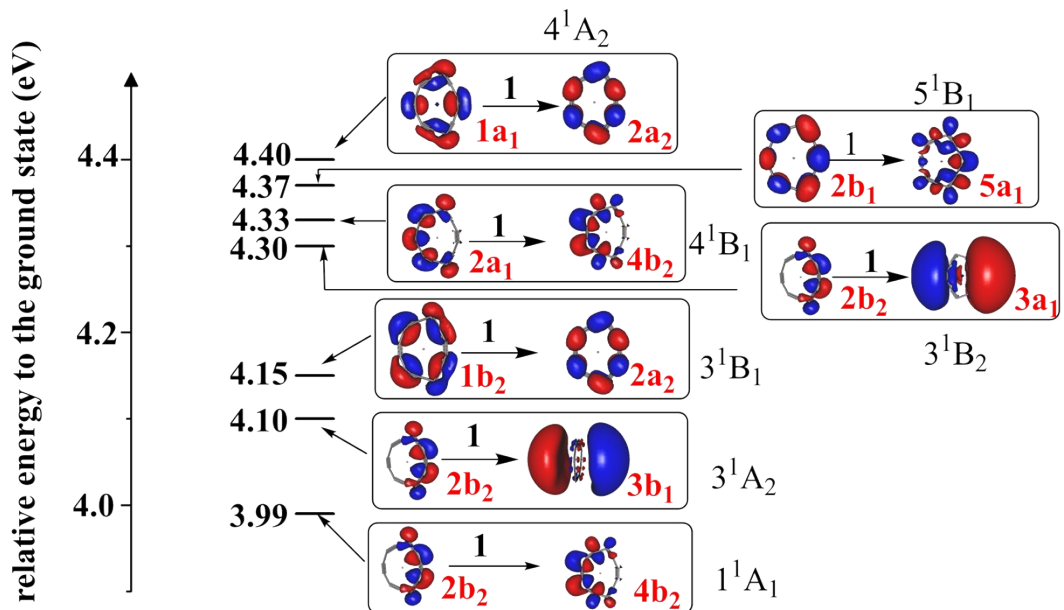

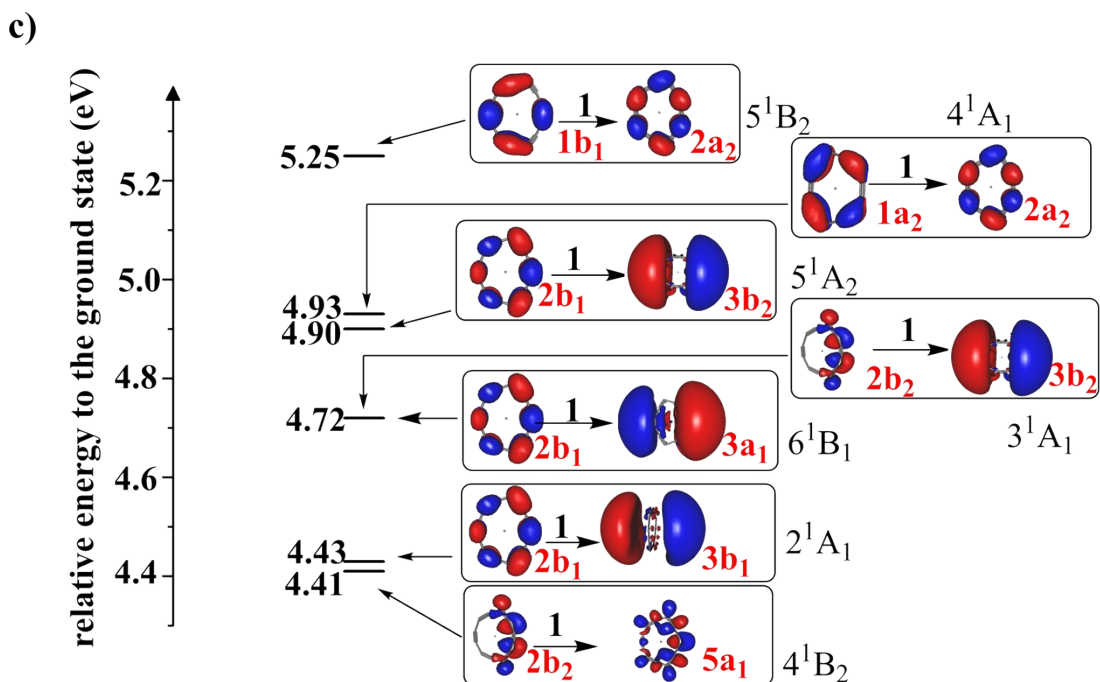

**Figure S3.** The relative energies of the singly-excited singlet states of  $\text{Li@C}_{12}^-$  relative to that of its global ground state. The states in black and red blocks are singly-excited singlet state and doubly-excited singlet state, respectively. The doubly-occupied HOMO of the doubly-excited state and the singly-occupied orbitals of the singly-excited states are shown. a) The excited states with a relative energy to the ground state between 1.0 and 4.0 eV. b) The excited states with a relative energy to the ground state between 4.0 and 4.4 eV. c) The excited states with a relative energy to the ground state between 4.4 and 5.3 eV. The energies of the singly-excited states are vertical excitation energies based on the equilibrium geometry of the anion in its ground state. The energy of the doubly-excited is obtained at its own optimized equilibrium geometry.



**Table S5. The frontier HF orbitals of the ground state of Li@C<sub>12</sub><sup>-</sup> at HF/cc-pVTZ level.**

| <b>Occupied orbitals</b> |                                     |                                   |                                   |                                |
|--------------------------|-------------------------------------|-----------------------------------|-----------------------------------|--------------------------------|
| <b>Orbital number</b>    | <b>HF Orbital eigenvalue (a.u.)</b> | <b>HF Orbital eigenvalue (eV)</b> | <b>Irreducible representation</b> | <b>symbols in Figure S2/S3</b> |
| 32                       | -0.282059                           | -7.675213                         | A1                                | 1a <sub>1</sub>                |
| 33                       | -0.266895                           | -7.262578                         | B2                                | 1b <sub>2</sub>                |
| 34                       | -0.260971                           | -7.101376                         | B1                                | 1b <sub>1</sub>                |
| 35                       | -0.256898                           | -6.990550                         | A2                                | 1a <sub>2</sub>                |
| 36                       | -0.171314                           | -4.661692                         | A1                                | 2a <sub>1</sub>                |
| 37                       | -0.139003                           | -3.782472                         | B2                                | 2b <sub>2</sub>                |
| 38                       | -0.125571                           | -3.416970                         | B1                                | 2b <sub>1</sub>                |
| <b>Virtual orbitals</b>  |                                     |                                   |                                   |                                |
| <b>Orbital number</b>    | <b>HF Orbital eigenvalue (a.u.)</b> | <b>HF Orbital eigenvalue (eV)</b> | <b>Irreducible representation</b> | <b>symbols in Figure S2/S3</b> |
| 39                       | 0.139472                            | 3.795226                          | A2                                | 2a <sub>2</sub>                |
| 40                       | 0.151360                            | 4.118718                          | B1                                | 3b <sub>1</sub>                |
| 41                       | 0.156967                            | 4.271297                          | A1                                | 3a <sub>1</sub>                |
| 42                       | 0.165662                            | 4.507903                          | B2                                | 3b <sub>2</sub>                |
| 43                       | 0.174822                            | 4.757139                          | A1                                | 4a <sub>1</sub>                |
| 44                       | 0.234374                            | 6.377652                          | B2                                | 4b <sub>2</sub>                |
| 45                       | 0.249653                            | 6.793408                          | A1                                | 5a <sub>1</sub>                |

## **S5. The optimization of the geometries of the ground and doubly-excited states of the endohedral fullerene $\text{Li@C}_{20}^-$ anion**

We optimized the geometries of the ground state and the doubly-excited state of the endohedral fullerene anion  $\text{Li@C}_{20}^-$  in different symmetries (see in the main text). The geometries and relative energies in different symmetries are shown in Figure S4 and Table S6. The cartesian coordinates of the optimized geometries of the ground and doubly-excited states of  $\text{Li@C}_{20}^-$  are shown in Table S7. One can see that the ground state of  $\text{Li@C}_{20}^-$  in  $D_{5d}$  symmetry is the energy favored structure.

To find out whether the ground and doubly-excited states are bound or not, we also optimized the geometries of neutral  $\text{Li@C}_{20}$  in different symmetries. We found that the energy favored geometry is in  $D_{3d}$  symmetry. The electron affinity of neutral  $\text{Li@C}_{20}$  is found to be around 2.59 eV. The cartesian coordinates of the equilibrium geometry of the ground state of neutral  $\text{Li@C}_{20}$  in  $D_{3d}$  symmetry are shown in Table S8.

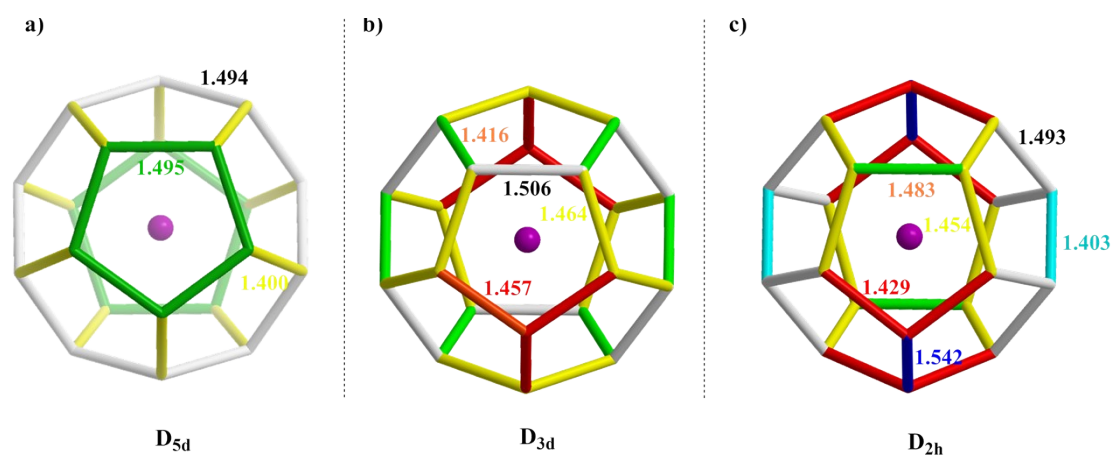

**Figure S4.** The equilibrium geometries of the ground state of  $\text{Li@C}_{20}^-$  in different symmetries optimized at CCSD/cc-pVTZ level. a)  $\text{Li@C}_{20}^-$  in  $D_{5d}$  symmetry. b)  $\text{Li@C}_{20}^-$  in  $D_{3d}$  symmetry. c)  $\text{Li@C}_{20}^-$  in  $D_{2h}$  symmetry. The units are Å.

**Table S6.** Energies of the ground state and doubly-excited state of  $\text{Li@C}_{20}^-$  in different symmetries at CCSD/ cc-pVTZ level. The orbital compositions of the ground and doubly-excited states are in brackets.

| $\text{Li@C}_{20}^-$                                                                                                    | Total energy (a.u.) | Relative energy(eV) |
|-------------------------------------------------------------------------------------------------------------------------|---------------------|---------------------|
| $D_{5d}$ (ground state)<br>(20 $a_g$ +13 $a_u$ +17 $b_u$ +12 $b_g$ )                                                    | -767.700336         | 0.00                |
| $D_{3d}$ (ground state)<br>(20 $a_g$ +13 $a_u$ +17 $b_u$ +12 $b_g$ )                                                    | -767.672992         | 0.74                |
| $D_{2h}$ (ground state)<br>(14 $a_g$ +9 $b_{2u}$ +9 $b_{3u}$ +6 $b_{1g}$ +8 $b_{1u}$ +6 $b_{3g}$ +6 $b_{2g}$ +4 $a_u$ ) | -767.688547         | 0.32                |
| $D_{5d}$ (doubly-excited state)<br>(20 $a_g$ +14 $a_u$ +16 $b_u$ +12 $b_g$ )                                            | -767.649670         | 1.38                |

**Table S7. Cartesian coordinates of Li@C<sub>20</sub><sup>-</sup> in different symmetries optimized at CCSD/ cc-pVTZ level. The orbital compositions of the ground and doubly-excited states are in brackets. Unit is Å.**

|                                                                                                                                                                                           |                                                                                                                                                                        |              |              |              |             |
|-------------------------------------------------------------------------------------------------------------------------------------------------------------------------------------------|------------------------------------------------------------------------------------------------------------------------------------------------------------------------|--------------|--------------|--------------|-------------|
| <p style="text-align: center;">Li@C<sub>20</sub><sup>-</sup><br/>(ground state)<br/>D<sub>5d</sub> symmetry<br/>(20 a<sub>g</sub>+13 a<sub>u</sub>+17 b<sub>u</sub>+12 b<sub>g</sub>)</p> | Li                                                                                                                                                                     | 0.000000000  | 0.000000000  | 0.000000000  |             |
|                                                                                                                                                                                           | C                                                                                                                                                                      | -1.028614541 | 1.558147894  | -0.747332210 |             |
|                                                                                                                                                                                           | C                                                                                                                                                                      | -1.028614541 | 1.558147894  | 0.747332210  |             |
|                                                                                                                                                                                           | C                                                                                                                                                                      | 0.392895793  | 1.558147894  | 1.209208914  |             |
|                                                                                                                                                                                           | C                                                                                                                                                                      | 1.271437497  | 1.558147894  | 0.000000000  |             |
|                                                                                                                                                                                           | C                                                                                                                                                                      | 0.392895793  | 1.558147894  | -1.209208914 |             |
|                                                                                                                                                                                           | C                                                                                                                                                                      | 1.028614541  | -1.558147894 | 0.747332210  |             |
|                                                                                                                                                                                           | C                                                                                                                                                                      | -0.392895793 | -1.558147894 | 1.209208914  |             |
|                                                                                                                                                                                           | C                                                                                                                                                                      | -1.271437497 | -1.558147894 | 0.000000000  |             |
|                                                                                                                                                                                           | C                                                                                                                                                                      | -0.392895793 | -1.558147894 | -1.209208914 |             |
|                                                                                                                                                                                           | C                                                                                                                                                                      | 1.028614541  | -1.558147894 | -0.747332210 |             |
|                                                                                                                                                                                           | C                                                                                                                                                                      | -1.659592623 | 0.395586796  | -1.205764621 |             |
|                                                                                                                                                                                           | C                                                                                                                                                                      | -1.659592623 | 0.395586796  | 1.205764621  |             |
|                                                                                                                                                                                           | C                                                                                                                                                                      | 0.633907972  | 0.395586796  | 1.950968142  |             |
|                                                                                                                                                                                           | C                                                                                                                                                                      | 2.051369301  | 0.395586796  | 0.000000000  |             |
|                                                                                                                                                                                           | C                                                                                                                                                                      | 0.633907972  | 0.395586796  | -1.950968142 |             |
|                                                                                                                                                                                           | C                                                                                                                                                                      | 1.659592623  | -0.395586796 | 1.205764621  |             |
|                                                                                                                                                                                           | C                                                                                                                                                                      | -0.633907972 | -0.395586796 | 1.950968142  |             |
|                                                                                                                                                                                           | <p style="text-align: center;">Li@C<sub>20</sub><sup>-</sup><br/>D<sub>3d</sub> symmetry<br/>(20 a<sub>g</sub>+13 a<sub>u</sub>+17 b<sub>u</sub>+12 b<sub>g</sub>)</p> | Li           | 0.000000000  | 0.000000000  | 0.000000000 |
|                                                                                                                                                                                           |                                                                                                                                                                        | C            | 0.000000000  | 1.960202930  | 0.000000000 |
| C                                                                                                                                                                                         |                                                                                                                                                                        | -0.692297755 | 1.505079206  | 1.199094892  |             |
| C                                                                                                                                                                                         |                                                                                                                                                                        | 1.384595516  | 1.505079206  | 0.000000000  |             |
| C                                                                                                                                                                                         |                                                                                                                                                                        | -0.692297755 | 1.505079206  | -1.199094892 |             |
| C                                                                                                                                                                                         |                                                                                                                                                                        | 0.249850509  | 0.662632126  | 1.938812353  |             |
| C                                                                                                                                                                                         |                                                                                                                                                                        | 1.554135498  | 0.662632126  | -1.185783062 |             |
| C                                                                                                                                                                                         |                                                                                                                                                                        | -1.803986007 | 0.662632126  | -0.753029290 |             |
| C                                                                                                                                                                                         |                                                                                                                                                                        | -1.803986007 | 0.662632126  | 0.753029290  |             |
| C                                                                                                                                                                                         |                                                                                                                                                                        | 1.554135498  | 0.662632126  | 1.185783062  |             |
| C                                                                                                                                                                                         |                                                                                                                                                                        | 0.249850509  | 0.662632126  | -1.938812353 |             |
| C                                                                                                                                                                                         |                                                                                                                                                                        | 0.000000000  | -1.960202930 | 0.000000000  |             |
| C                                                                                                                                                                                         |                                                                                                                                                                        | -1.384595516 | -1.505079206 | 0.000000000  |             |
| C                                                                                                                                                                                         |                                                                                                                                                                        | 0.692297755  | -1.505079206 | -1.199094892 |             |
| C                                                                                                                                                                                         |                                                                                                                                                                        | 0.692297755  | -1.505079206 | 1.199094892  |             |
| C                                                                                                                                                                                         |                                                                                                                                                                        | -1.554135498 | -0.662632126 | -1.185783062 |             |
| C                                                                                                                                                                                         |                                                                                                                                                                        | 1.803986007  | -0.662632126 | -0.753029290 |             |

**Table S7 (continued)**

|                                                                                                                                                                                                                                                |             |              |              |              |
|------------------------------------------------------------------------------------------------------------------------------------------------------------------------------------------------------------------------------------------------|-------------|--------------|--------------|--------------|
|                                                                                                                                                                                                                                                | C           | -0.249850509 | -0.662632126 | 1.938812353  |
|                                                                                                                                                                                                                                                | C           | -1.554135498 | -0.662632126 | 1.185783062  |
|                                                                                                                                                                                                                                                | C           | -0.249850509 | -0.662632126 | -1.938812353 |
|                                                                                                                                                                                                                                                | C           | 1.803986007  | -0.662632126 | 0.753029290  |
| <p style="text-align: center;">Li@C<sub>20</sub><sup>-</sup><br/>D<sub>2h</sub> symmetry<br/>(14 a<sub>g</sub>+9 b<sub>2u</sub>+9 b<sub>3u</sub>+6 b<sub>1g</sub>+<br/>8 b<sub>1u</sub>+6 b<sub>3g</sub>+6 b<sub>2g</sub>+4 a<sub>u</sub>)</p> | Li          | 0.000000000  | 0.000000000  | 0.000000000  |
|                                                                                                                                                                                                                                                | C           | 1.917497686  | 0.000000000  | 0.701285016  |
|                                                                                                                                                                                                                                                | C           | 1.917497686  | 0.000000000  | -0.701285016 |
|                                                                                                                                                                                                                                                | C           | -1.917497686 | 0.000000000  | 0.701285016  |
|                                                                                                                                                                                                                                                | C           | -1.917497686 | 0.000000000  | -0.701285016 |
|                                                                                                                                                                                                                                                | C           | 0.000000000  | -0.771088279 | 1.893030456  |
|                                                                                                                                                                                                                                                | C           | 0.000000000  | 0.771088279  | 1.893030456  |
|                                                                                                                                                                                                                                                | C           | 0.000000000  | -0.771088279 | -1.893030456 |
|                                                                                                                                                                                                                                                | C           | 0.000000000  | 0.771088279  | -1.893030456 |
|                                                                                                                                                                                                                                                | C           | 0.741585134  | -2.009020526 | 0.000000000  |
|                                                                                                                                                                                                                                                | C           | -0.741585134 | -2.009020526 | 0.000000000  |
|                                                                                                                                                                                                                                                | C           | 0.741585134  | 2.009020526  | 0.000000000  |
|                                                                                                                                                                                                                                                | C           | -0.741585134 | 2.009020526  | 0.000000000  |
|                                                                                                                                                                                                                                                | C           | -1.136347869 | 1.195109579  | 1.137969099  |
|                                                                                                                                                                                                                                                | C           | -1.136347869 | -1.195109579 | 1.137969099  |
|                                                                                                                                                                                                                                                | C           | -1.136347869 | -1.195109579 | -1.137969099 |
|                                                                                                                                                                                                                                                | C           | -1.136347869 | 1.195109579  | -1.137969099 |
|                                                                                                                                                                                                                                                | C           | 1.136347869  | 1.195109579  | 1.137969099  |
| C                                                                                                                                                                                                                                              | 1.136347869 | -1.195109579 | 1.137969099  |              |
| C                                                                                                                                                                                                                                              | 1.136347869 | -1.195109579 | -1.137969099 |              |
| C                                                                                                                                                                                                                                              | 1.136347869 | 1.195109579  | -1.137969099 |              |
| <p style="text-align: center;">Li@C<sub>20</sub><sup>-</sup><br/>(doubly-excited state)<br/>D<sub>5d</sub> symmetry<br/>(20 a<sub>g</sub>+14 a<sub>u</sub>+16 b<sub>u</sub>+12 b<sub>g</sub>)</p>                                              | Li          | 0.000000000  | 0.000000000  | 0.000000000  |
|                                                                                                                                                                                                                                                | C           | -1.004325003 | 1.625059505  | -0.729684826 |
|                                                                                                                                                                                                                                                | C           | -1.004325003 | 1.625059505  | 0.729684826  |
|                                                                                                                                                                                                                                                | C           | 0.383618014  | 1.625059505  | 1.180654853  |
|                                                                                                                                                                                                                                                | C           | 1.241413980  | 1.625059505  | 0.000000000  |
|                                                                                                                                                                                                                                                | C           | 0.383618014  | 1.625059505  | -1.180654853 |
|                                                                                                                                                                                                                                                | C           | 1.004325003  | -1.625059505 | 0.729684826  |
|                                                                                                                                                                                                                                                | C           | -0.383618014 | -1.625059505 | 1.180654853  |
|                                                                                                                                                                                                                                                | C           | -1.241413980 | -1.625059505 | 0.000000000  |
|                                                                                                                                                                                                                                                | C           | -0.383618014 | -1.625059505 | -1.180654853 |
|                                                                                                                                                                                                                                                | C           | 1.004325003  | -1.625059505 | -0.729684826 |
|                                                                                                                                                                                                                                                | C           | -1.627951739 | 0.383404194  | -1.182776172 |
|                                                                                                                                                                                                                                                | C           | -1.627951739 | 0.383404194  | 1.182776172  |
|                                                                                                                                                                                                                                                | C           | 0.621822231  | 0.383404194  | 1.913772045  |
|                                                                                                                                                                                                                                                | C           | 2.012259012  | 0.383404194  | 0.000000000  |
|                                                                                                                                                                                                                                                | C           | 0.621822231  | 0.383404194  | -1.913772045 |
|                                                                                                                                                                                                                                                | C           | 1.627951739  | -0.383404194 | 1.182776172  |

**Table S7 (continued)**

|  |   |              |              |              |
|--|---|--------------|--------------|--------------|
|  | C | -0.621822231 | -0.383404194 | 1.913772045  |
|  | C | -2.012259012 | -0.383404194 | 0.000000000  |
|  | C | -0.621822231 | -0.383404194 | -1.913772045 |
|  | C | 1.627951739  | -0.383404194 | -1.182776172 |

**Table S8. Cartesian coordinates of the equilibrium geometry of the ground state of neutral Li@C<sub>20</sub> in D<sub>3d</sub> symmetry calculated at EOM-EA-CCSD/cc-pVTZ level. The orbital compositions of the closed-shell Li<sup>+</sup>@C<sub>20</sub> reference in different irreducible representations are listed. Unit is Å.**

|                                                                                                                                         |             |              |              |              |
|-----------------------------------------------------------------------------------------------------------------------------------------|-------------|--------------|--------------|--------------|
| Neutral Li@C <sub>20</sub><br>D <sub>3d</sub> symmetry<br>(20 a <sub>g</sub> +13 a <sub>u</sub> +16 b <sub>u</sub> +12 b <sub>g</sub> ) | Li          | 0.000000000  | 0.000000000  | 0.000000000  |
|                                                                                                                                         | C           | 0.000000000  | 1.959354368  | 0.000000000  |
|                                                                                                                                         | C           | -0.686171518 | 1.483501474  | 1.188483936  |
|                                                                                                                                         | C           | 1.372343041  | 1.483501474  | 0.000000000  |
|                                                                                                                                         | C           | -0.686171518 | 1.483501474  | -1.188483936 |
|                                                                                                                                         | C           | 0.250181964  | 0.657627290  | 1.944998445  |
|                                                                                                                                         | C           | 1.559327081  | 0.657627290  | -1.189163156 |
|                                                                                                                                         | C           | -1.809509046 | 0.657627290  | -0.755835284 |
|                                                                                                                                         | C           | -1.809509046 | 0.657627290  | 0.755835284  |
|                                                                                                                                         | C           | 1.559327081  | 0.657627290  | 1.189163156  |
|                                                                                                                                         | C           | 0.250181964  | 0.657627290  | -1.944998445 |
|                                                                                                                                         | C           | 0.000000000  | -1.959354368 | 0.000000000  |
|                                                                                                                                         | C           | -1.372343041 | -1.483501474 | 0.000000000  |
|                                                                                                                                         | C           | 0.686171518  | -1.483501474 | -1.188483936 |
|                                                                                                                                         | C           | 0.686171518  | -1.483501474 | 1.188483936  |
|                                                                                                                                         | C           | -1.559327081 | -0.657627290 | -1.189163156 |
|                                                                                                                                         | C           | 1.809509046  | -0.657627290 | -0.755835284 |
|                                                                                                                                         | C           | -0.250181964 | -0.657627290 | 1.944998445  |
|                                                                                                                                         | C           | -1.559327081 | -0.657627290 | 1.189163156  |
|                                                                                                                                         | C           | -0.250181964 | -0.657627290 | -1.944998445 |
| C                                                                                                                                       | 1.809509046 | -0.657627290 | 0.755835284  |              |

## S6. Vibrational frequency calculation for the ground state of Li@C<sub>20</sub><sup>-</sup>.

To ensure that the found structure of the ground state of Li@C<sub>20</sub><sup>-</sup> within D<sub>5d</sub> symmetry provides a minimum on the energy surface, we calculate the vibrational frequencies and the results are shown in Table S9. All frequencies are found to be real proving that it is indeed a minimum.

**Table S9. Vibrational frequencies of the ground state of Li@C<sub>20</sub><sup>-</sup>. The frequencies are obtained at CCSD/cc-pVTZ level. All units are in cm<sup>-1</sup>.**

| Ground state |          |     |          |     |           |     |           |
|--------------|----------|-----|----------|-----|-----------|-----|-----------|
| E1g          | 403.8985 | E1g | 641.6806 | E2g | 976.3586  | E1u | 1301.3981 |
| E1g          | 403.8985 | E1u | 645.8426 | E1g | 1032.7195 | A2u | 1348.7908 |
| E2g          | 428.6872 | E1u | 645.8426 | E1g | 1032.7195 | E1g | 1361.7835 |
| E2g          | 428.6872 | A2u | 648.0605 | A1g | 1040.3395 | E1g | 1361.7835 |
| A1g          | 522.5631 | A1u | 685.5082 | E2u | 1107.9418 | E2u | 1382.8369 |
| E1u          | 525.1411 | E2g | 750.8833 | E2u | 1107.9418 | E2u | 1382.8369 |
| E1u          | 525.1411 | E2g | 750.8833 | E1u | 1139.4284 | E2g | 1393.648  |
| E2u          | 607.5067 | E2u | 764.031  | E1u | 1139.4284 | E2g | 1393.648  |
| E2u          | 607.5067 | E2u | 764.031  | E2u | 1182.368  | A1g | 1446.876  |
| E2u          | 616.6023 | A2u | 807.123  | E2u | 1182.368  |     |           |
| E2u          | 616.6023 | A2g | 816.0372 | E2g | 1205.8876 |     |           |
| E1u          | 623.1821 | A1g | 822.4694 | E2g | 1205.8876 |     |           |
| E1u          | 623.1821 | A2u | 906.5265 | E1g | 1232.8247 |     |           |
| E2g          | 623.773  | E1u | 916.892  | E1g | 1232.8247 |     |           |

|     |          |     |          |     |           |  |
|-----|----------|-----|----------|-----|-----------|--|
| E2g | 623.773  | E1u | 916.892  | A1u | 1277.8321 |  |
| E1g | 641.6806 | E2g | 976.3586 | E1u | 1301.3981 |  |

### S7. The full picture of the excited states of Li@C<sub>20</sub><sup>-</sup>

The singly-excited triplet and singly-excited singlet states of Li@C<sub>20</sub><sup>-</sup>, obtained at EOM-EE-CCSD/cc-pVTZ level, are shown in Figure S5 and S6, respectively. For the degenerate states, only one component is shown. The orbital energies and irreducible representations of frontier HF orbitals are shown in Table S10. The low-lying triplet states are formed by exciting one electron from HOMO, HOMO-1 and HOMO-2 to LUMO and LUMO+1. All low-lying states are valence states.

Comparing singly-excited singlet states to triplet states, one can easily see that there is a moderate energy gap between the singlet states and their triplet counterparts, i.e., ~0.50 eV (<sup>1</sup>E<sub>1g</sub> and <sup>1</sup>E<sub>1g</sub>, or <sup>1</sup>E<sub>2g</sub> and <sup>1</sup>E<sub>2g</sub>). All other singlet states are higher in energy than the neutral Li@C<sub>20</sub> except of the singly-excited singlet states <sup>1</sup>E<sub>1g</sub> and <sup>1</sup>E<sub>2g</sub>.



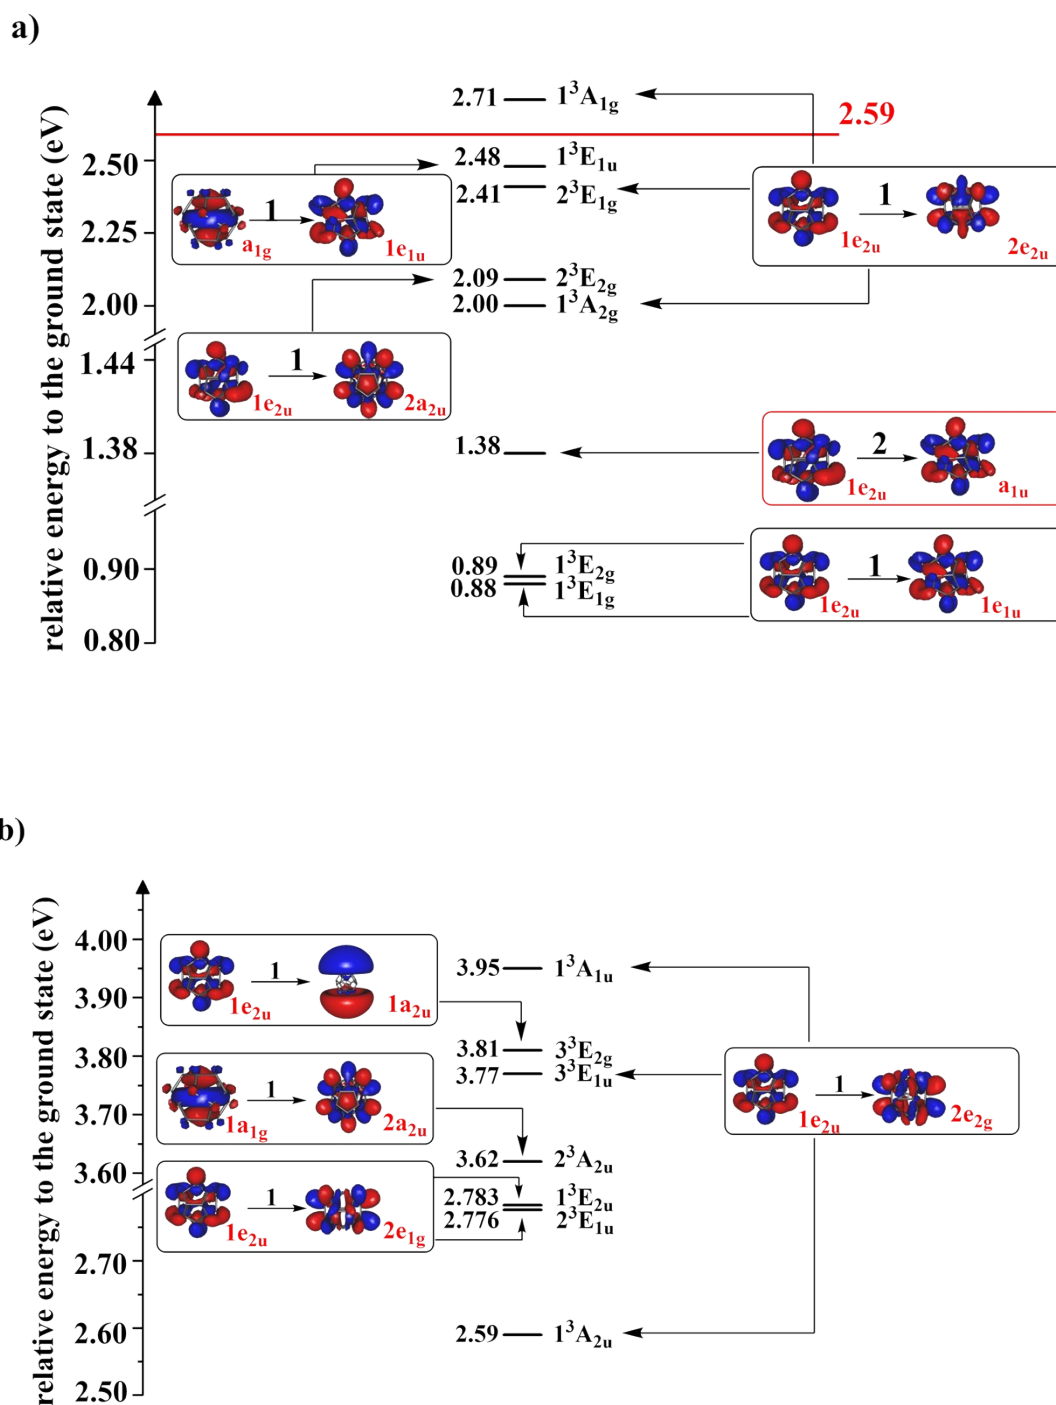

Figure S5. The relative energies of the singly-excited triplet states of  $Li@C_{20}^-$  relative to that of its global ground state. The states in black blocks are singly-excited triplet states and the doubly-excited singlet state is shown for comparison in a red block. The doubly-occupied

**HOMO of the doubly-excited state and the singly-occupied orbitals of the singly-excited states are shown. a) The excited states with a relative energy to the ground state between 0.5 and 2.5 eV. b) The excited states with a relative energy to the ground state between 2.5 and 4.0 eV. The irreducible representations of the orbitals and the states are also shown. The energies of the singly-excited states are vertical excitation energies based on the equilibrium geometry of the anion in its ground state. The energy of the doubly-excited state is obtained at its  $D_{5d}$  equilibrium geometry.**

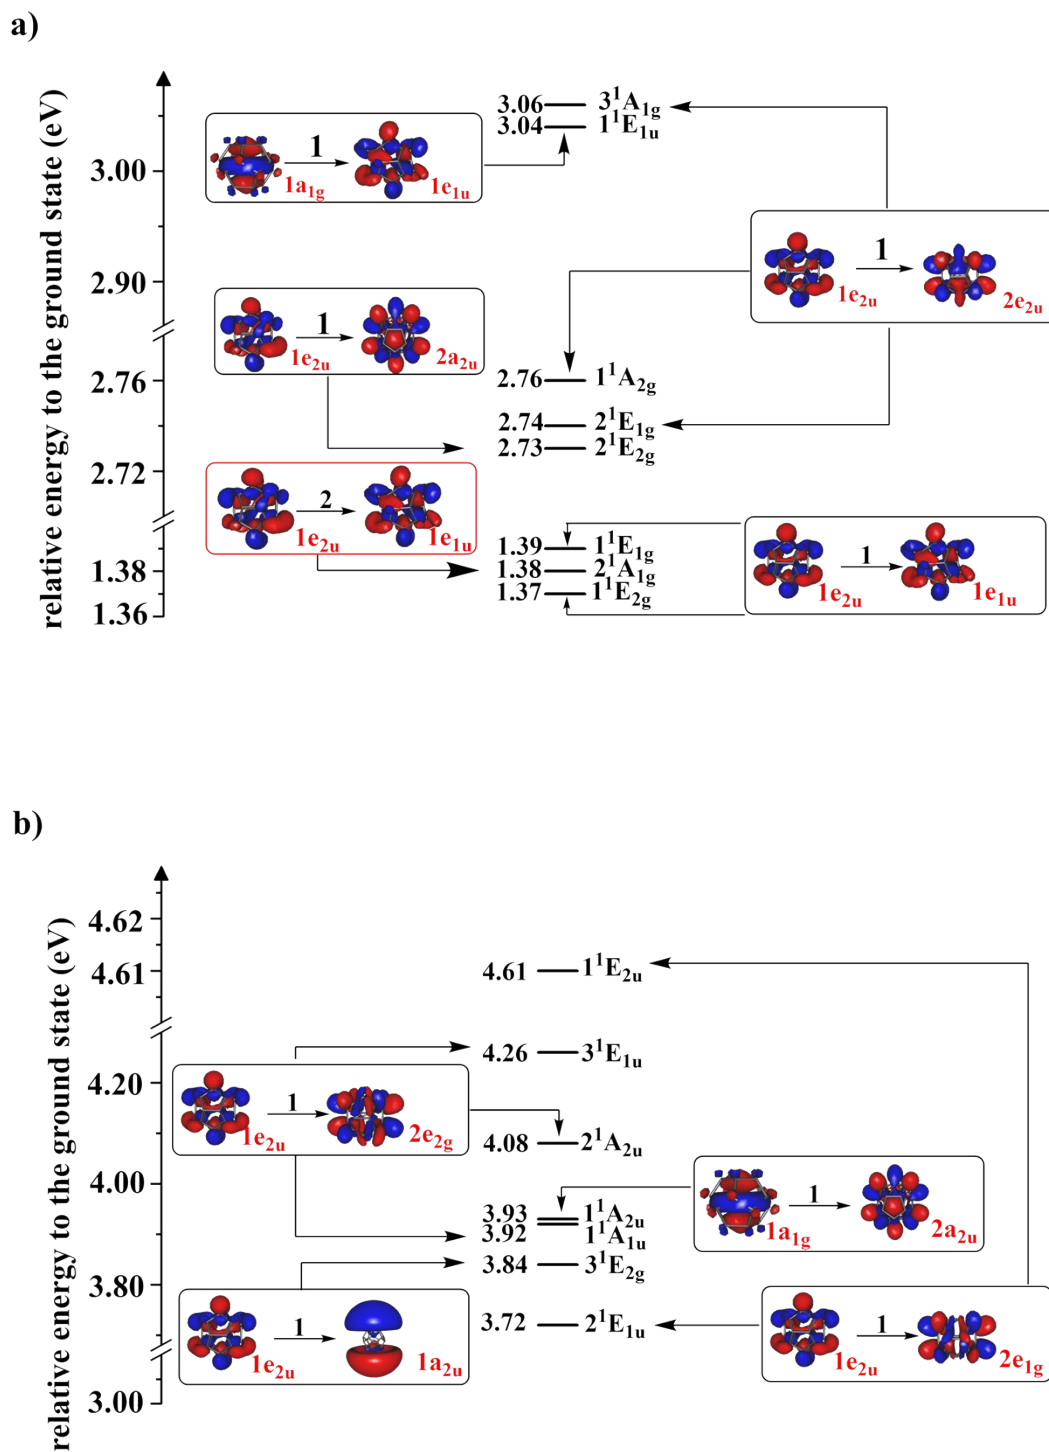

Figure S6. The energies of the excited singlet states of  $\text{Li}@C_{20}^-$  relative to that of its global ground state. The states in black and red blocks

are singly-excited singlet and doubly-excited singlet states, respectively. a) The excited states with a relative energy to the ground state between 1.0 and 3.0 eV. b) The excited states with a relative energy to the ground state between 3.0 and 4.2 eV. The irreducible representation of the orbitals and the states are also shown. For simplicity the orbitals of the ground state are shown in all boxes. The energies of the singly-excited states are vertical excitation energies based on the equilibrium geometry of the anion in its ground state. The energy of the doubly-excited state is obtained at its  $D_{5d}$  equilibrium geometry.

**Table S10. The frontier HF orbitals of the ground state of Li@C<sub>20</sub><sup>-</sup> at HF/cc-pVTZ level.**

| <b>Occupied orbitals</b> |                                     |                                   |                                   |                                |
|--------------------------|-------------------------------------|-----------------------------------|-----------------------------------|--------------------------------|
| <b>Orbital number</b>    | <b>HF Orbital eigenvalue (a.u.)</b> | <b>HF Orbital eigenvalue (eV)</b> | <b>Irreducible representation</b> | <b>symbols in Figure S5/S6</b> |
| 56+57                    | -0.238712                           | -6.495675                         | E2g                               | 1e <sub>2g</sub>               |
| 58+59                    | -0.223383                           | -6.078550                         | E1g                               | 1e <sub>1g</sub>               |
| 60                       | -0.145743                           | -3.965870                         | A1g                               | 1a <sub>1g</sub>               |
| 61+62                    | -0.099573                           | -2.709521                         | E2u                               | 1e <sub>2u</sub>               |
| <b>Virtual orbitals</b>  |                                     |                                   |                                   |                                |
| <b>Orbital number</b>    | <b>HF Orbital eigenvalue (a.u.)</b> | <b>HF Orbital eigenvalue (eV)</b> | <b>Irreducible representation</b> | <b>symbols in Figure S5/S6</b> |
| 63+64                    | 0.142043                            | 3.865188                          | E1u                               | 1e <sub>1u</sub>               |
| 65                       | 0.153227                            | 4.169509                          | A2u                               | 1a <sub>2u</sub>               |
| 66+67                    | 0.157881                            | 4.296157                          | E1u                               | 2e <sub>1u</sub>               |
| 68                       | 0.196743                            | 5.353640                          | A1g                               | 2a <sub>1g</sub>               |
| 69                       | 0.206359                            | 5.615314                          | A2u                               | 2a <sub>2u</sub>               |
| 70+71                    | 0.224254                            | 6.102267                          | E2u                               | 2e <sub>2u</sub>               |
| 72+73                    | 0.260323                            | 7.083745                          | E1g                               | 2e <sub>1g</sub>               |
| 74+75                    | 0.279731                            | 7.611855                          | E2g                               | 2e <sub>2g</sub>               |

## S8. Potential energy surface scan of low-lying closed-shell states of Li@C<sub>12</sub><sup>-</sup>

As mentioned in the main text, we scanned the potential energy surface of the low-lying closed-shell states of Li@C<sub>12</sub><sup>-</sup> anion. We scanned them along two minimum energy pathways,  $q_1$  and  $q_2$ . The polyynic D<sub>6h</sub> structure is obtained by geometry optimization keeping the contributed orbitals (18a<sub>1</sub>+3b<sub>1</sub>+14b<sub>2</sub>+3a<sub>2</sub>). The internal coordinate parameters used in Figure 3 of the main text are obtained using the following equation:

$$P_{final} = P_{polyynic} + (P_{C_{2v}} - P_{polyynic}) * q_1 \quad (\text{eq1})$$

where  $P_{final}$  are the parameters of the points used in Figure 3.  $P_{C_{2v}}$  and  $P_{polyynic}$ , which are shown in the Table S11, are the parameters of the C<sub>2v</sub> and polyynic D<sub>6h</sub> structures, respectively. Along  $q_1$ , we keep the working group as C<sub>2v</sub>.

Similarly, we obtained the internal coordinate parameters along  $q_2$  using the following equation:

$$P_{final} = P_{polyynic} + (P_{cumulenic} - P_{polyynic}) * q_2 \quad (\text{eq2})$$

where  $P_{final}$  are the parameters of the points used in Figure 3.  $P_{cumulenic}$  and  $P_{polyynic}$ , which are shown in the Table S12, are the parameters of cumulenic and polyynic D<sub>6h</sub> structures, respectively. Along the  $q_2$ , the working point group is C<sub>2h</sub> symmetry.

By changing the occupation numbers, one can obtain the ground and doubly-excited states. For example, in the  $q_1$  region of Figure 3, the  $1^1A_1$  ( $18 a_1+4 b_1+14 b_2+2 a_2$ ),  $2^1A_1$  ( $17 a_1+4 b_1+14 b_2+3 a_2$ ), and  $3^1A_1$  ( $18 a_1+3 b_1+14 b_2+3 a_2$ ) states possess different occupations. We also listed the HOMO, HOMO-1, and HOMO-2 orbitals of these three states at HF/cc-pVTZ level in Tables S13, S14, and S15, respectively. It is noteworthy that the three orbitals are different in different states and the same state would possess the same three highest occupied molecular orbitals along  $q_1$ . This finding shows the validation of our delta-SCF method.

In the  $q_2$  region of Figure 3, the state corresponding to  $2^1A_1$  and  $3^1A_1$  possess different occupations. Their three highest occupied orbitals at HF/cc-pVTZ level are shown in Table S16 and S17. However, the state  $1^1A_1$  possesses the same occupation numbers as  $3^1A_1$ . Due to the limitation of delta-SCF, we cannot obtain the energy of  $1^1A_1$  in the  $q_2$  region. Thus, there are only two curves in the  $q_2$  region. The change in geometry along  $q_2$ , i.e., from  $D_{6h}$  polyynic to  $D_{6h}$  cumulenic, is rather small, so that one can expect the variation of the energy of  $1^1A_1$  to be also rather moderate in the  $q_2$  region.

**Table S11. The internal coordinates of Li@C<sub>12</sub><sup>-</sup> anion in C<sub>2v</sub> symmetry. The parameters changed along the q<sub>1</sub> are marked bold.**

**Unit is Å.**

|                                                                 |                            |                           |
|-----------------------------------------------------------------|----------------------------|---------------------------|
| Li@C <sub>12</sub> <sup>-</sup><br><br>C <sub>2v</sub> symmetry | Li                         |                           |
|                                                                 | X 1 RX                     |                           |
|                                                                 | C 1 RC1 2 A90              |                           |
|                                                                 | C 1 RC1 3 A1 2 D90         |                           |
|                                                                 | C 3 RC2 1 A2 4 D180        |                           |
|                                                                 | C 4 RC2 1 A2 5 D180        |                           |
|                                                                 | C 5 RC3 1 A3 3 D180        |                           |
|                                                                 | C 6 RC3 1 A3 4 D180        |                           |
|                                                                 | C 7 RC4 1 A4 5 D180        |                           |
|                                                                 | C 8 RC4 1 A4 6 D180        |                           |
|                                                                 | C 9 RC5 1 A5 7 D180        |                           |
|                                                                 | C 10 RC5 1 A5 8 D180       |                           |
|                                                                 | C 11 RC6 1 A6 9 D180       |                           |
|                                                                 | C 12 RC6 1 A6 10 D180      |                           |
|                                                                 | RX =                       | 1.0000000000000000        |
|                                                                 | <b>RC1 =</b>               | <b>2.141080330955184</b>  |
|                                                                 | A90 =                      | 90.0000000000000000       |
|                                                                 | <b>A1 =</b>                | <b>35.368253826291742</b> |
|                                                                 | D90 =                      | 90.0000000000000000       |
|                                                                 | <b>RC2 =</b>               | <b>1.291452908929988</b>  |
| <b>A2 =</b>                                                     | <b>83.674736736275321</b>  |                           |
| D180 =                                                          | 180.0000000000000000       |                           |
| <b>RC3 =</b>                                                    | <b>1.315494851727502</b>   |                           |
| <b>A3 =</b>                                                     | <b>107.598973791597459</b> |                           |
| <b>RC4 =</b>                                                    | <b>1.409778076064243</b>   |                           |
| <b>A4 =</b>                                                     | <b>55.826604748063758</b>  |                           |
| <b>RC5 =</b>                                                    | <b>1.231612652067053</b>   |                           |
| <b>A5 =</b>                                                     | <b>74.001230172832805</b>  |                           |
| <b>RC6 =</b>                                                    | <b>1.391888603532719</b>   |                           |
| <b>A6 =</b>                                                     | <b>62.455206786282538</b>  |                           |



**Table S11. (continued)**

|                                                                                                                                                                                         |                                                                                                                                                                                                                                                                                                                                                                                                                                                                                                                                                                                                                                                                                                                                                     |
|-----------------------------------------------------------------------------------------------------------------------------------------------------------------------------------------|-----------------------------------------------------------------------------------------------------------------------------------------------------------------------------------------------------------------------------------------------------------------------------------------------------------------------------------------------------------------------------------------------------------------------------------------------------------------------------------------------------------------------------------------------------------------------------------------------------------------------------------------------------------------------------------------------------------------------------------------------------|
| <p style="text-align: center;"><math>\text{Li@C}_{12}^-</math></p> <p style="text-align: center;">Polyynic <math>D_{6h}</math><br/>(working group <math>C_{2v}</math><br/>symmetry)</p> | <p>Li<br/>X 1 RX<br/>C 1 RC1 2 A90<br/>C 1 RC1 3 A1 2 D90<br/>C 3 RC2 1 A2 4 D180<br/>C 4 RC2 1 A2 5 D180<br/>C 5 RC3 1 A3 3 D180<br/>C 6 RC3 1 A3 4 D180<br/>C 7 RC4 1 A4 5 D180<br/>C 8 RC4 1 A4 6 D180<br/>C 9 RC5 1 A5 7 D180<br/>C 10 RC5 1 A5 8 D180<br/>C 11 RC6 1 A6 9 D180<br/>C 12 RC6 1 A6 10 D180</p> <p>RX = 1.00000<br/>A90 = 90.00000<br/>D90 = 90.0000<br/>D180 = 180.00000<br/><b>RC1 = 2.502600906</b><br/><b>A1 = 30.95454072</b><br/><b>RC2 = 1.25512426</b><br/><b>A2 = 75.47723373</b><br/><b>RC3 = 1.335668295</b><br/><b>A3 = 74.52273885</b><br/><b>RC4 = 1.255124308</b><br/><b>A4 = 75.47731372</b><br/><b>RC5 = 1.335668326</b><br/><b>A5 = 74.52267479</b><br/><b>RC6 = 1.255124142</b><br/><b>A6 = 75.4772469</b></p> |
|-----------------------------------------------------------------------------------------------------------------------------------------------------------------------------------------|-----------------------------------------------------------------------------------------------------------------------------------------------------------------------------------------------------------------------------------------------------------------------------------------------------------------------------------------------------------------------------------------------------------------------------------------------------------------------------------------------------------------------------------------------------------------------------------------------------------------------------------------------------------------------------------------------------------------------------------------------------|

**Table S12. The internal coordinates of  $\text{Li@C}_{12}^-$  anion in  $C_{2v}$  symmetry. The parameters changed along the  $q_1$  are marked bold.**

**Unit is Å.**

|                                                                                                      |                                                                                                                                                                                                                                                                                                                                                                                                                                                                                                     |
|------------------------------------------------------------------------------------------------------|-----------------------------------------------------------------------------------------------------------------------------------------------------------------------------------------------------------------------------------------------------------------------------------------------------------------------------------------------------------------------------------------------------------------------------------------------------------------------------------------------------|
| <p style="text-align: center;"><math>\text{Li@C}_{12}^-</math><br/>cumulenic <math>D_{6h}</math></p> | <p>Li<br/>X 1 R12<br/>C 1 R13 2 A90<br/>C 1 R14 3 A314 2 D90<br/>C 1 R13 3 A315 2 D90<br/>C 1 R14 5 A314 2 D90<br/>C 1 R13 5 A315 2 D90<br/>C 1 R14 7 A314 2 D90<br/>C 1 R13 7 A315 2 D90<br/>C 1 R14 9 A314 2 D90<br/>C 1 R13 9 A315 2 D90<br/>C 1 R14 11 A314 2 D90<br/>C 1 R13 11 A315 2 D90<br/>C 1 R14 13 A314 2 D90</p> <p>R12 = 1.00000000<br/><b>R13 = 2.5746053907</b><br/><b>R14 = 2.3797598225</b><br/><b>A314 = 30.0000000000</b><br/>A315 = 60.000<br/>D90 = 90.00<br/>A90 = 90.00</p> |
| <p style="text-align: center;"><math>\text{Li@C}_{12}^-</math><br/>Polyynic <math>D_{6h}</math></p>  | <p>Li<br/>X 1 R12<br/>C 1 R13 2 A90<br/>C 3 R34 1 A134 2 D90<br/>C 1 R13 3 A315 2 ND90<br/>C 5 R34 1 A134 2 D90<br/>C 1 R13 5 A315 2 ND90<br/>C 7 R34 1 A134 2 D90<br/>C 1 R13 7 A315 2 ND90<br/>C 9 R34 1 A134 2 D90<br/>C 1 R13 9 A315 2 ND90<br/>C 11 R34 1 A134 2 D90<br/>C 1 R13 11 A315 2 ND90<br/>C 13 R34 1 A134 2 D90</p> <p>R12 = 1.0000000000000000</p>                                                                                                                                  |

|  |                           |
|--|---------------------------|
|  | A90 = 90.0000000000000000 |
|--|---------------------------|

**Table S12. (continued)**

|                                                                     |                             |
|---------------------------------------------------------------------|-----------------------------|
| <p>Li@C<sub>12</sub><sup>-</sup></p> <p>Polyynic D<sub>6h</sub></p> | <b>R13 = 2.5026013</b>      |
|                                                                     | <b>R34 = 1.3356689</b>      |
|                                                                     | <b>A134 = 74.5227274</b>    |
|                                                                     | D90 = 90.0000000000000000   |
|                                                                     | A315 = 60.0000000000000000  |
|                                                                     | ND90 = -90.0000000000000000 |

**Table S13. The HOMO, HOMO-1, HOMO-2 of the state  $1^1A_1$  of  $Li@C_{12}^-$  changes along  $q_1$  mode in  $C_{2v}$  symmetry ( $18a_1+4b_1+14b_2+2a_2$ ) at HF/cc-pVTZ level.**

| $q_1$ | Relative energy (eV) | Orbital | Orbital energy (a.u.) | Orbital energies (eV) | Symbol | Orbital images |
|-------|----------------------|---------|-----------------------|-----------------------|--------|----------------|
| 0.0   | 3.44                 | HOMO    | -0.050263             | -1.37                 | $a_1$  |                |
|       |                      | HOMO-1  | -0.074678             | -2.03                 | $b_1$  |                |
|       |                      | HOMO-2  | -0.116109             | -3.16                 | $b_2$  |                |
| 0.1   | 2.96                 | HOMO    | -0.060423             | -1.64                 | $a_1$  |                |
|       |                      | HOMO-1  | -0.080833             | -2.20                 | $b_1$  |                |
|       |                      | HOMO-2  | -0.113173             | -3.08                 | $b_2$  |                |

**Table S13. (continued)**

|     |      |        |           |       |                |  |
|-----|------|--------|-----------|-------|----------------|--|
| 0.2 | 2.49 | HOMO   | -0.073562 | -2.00 | a <sub>1</sub> |  |
|     |      | HOMO-1 | -0.086726 | -2.36 | b <sub>1</sub> |  |
|     |      | HOMO-2 | -0.112940 | -3.07 | a <sub>2</sub> |  |
| 0.3 | 2.04 | HOMO   | -0.087203 | -2.37 | a <sub>1</sub> |  |
|     |      | HOMO-1 | -0.092292 | -2.51 | b <sub>1</sub> |  |
|     |      | HOMO-2 | -0.113881 | -3.10 | b <sub>2</sub> |  |
| 0.4 | 1.61 | HOMO   | -0.097575 | -2.66 | b <sub>1</sub> |  |
|     |      | HOMO-1 | -0.100834 | -2.74 | a <sub>1</sub> |  |

**Table S13. (continued)**

|     |      |        |           |       |                |                                                                                       |
|-----|------|--------|-----------|-------|----------------|---------------------------------------------------------------------------------------|
| 0.4 | 1.61 | HOMO-2 | -0.115813 | -3.15 | b <sub>2</sub> | 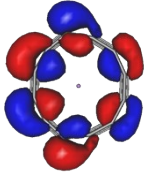   |
| 0.5 | 1.21 | HOMO   | -0.102615 | -2.79 | b <sub>1</sub> |    |
|     |      | HOMO-1 | -0.114164 | -3.11 | a <sub>1</sub> |    |
|     |      | HOMO-2 | -0.118633 | -3.23 | b <sub>2</sub> |   |
| 0.6 | 0.83 | HOMO   | -0.107455 | -2.92 | b <sub>1</sub> |  |
|     |      | HOMO-1 | -0.122191 | -3.32 | b <sub>2</sub> |  |
|     |      | HOMO-2 | -0.126978 | -3.46 | a <sub>1</sub> |  |
| 0.7 | 0.50 | HOMO   | -0.112138 | -3.05 | b <sub>1</sub> |  |

**Table S13. (continued)**

|     |      |        |           |       |                |                                                                                       |
|-----|------|--------|-----------|-------|----------------|---------------------------------------------------------------------------------------|
| 0.7 | 0.50 | HOMO-1 | -0.126285 | -3.44 | b <sub>2</sub> | 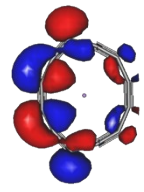   |
|     |      | HOMO-2 | -0.139139 | -3.79 | a <sub>1</sub> |    |
| 0.8 | 0.24 | HOMO   | -0.116703 | -3.18 | b <sub>1</sub> |    |
|     |      | HOMO-1 | -0.130660 | -3.56 | b <sub>2</sub> |   |
|     |      | HOMO-2 | -0.150582 | -4.10 | a <sub>1</sub> |  |
| 0.9 | 0.07 | HOMO   | -0.121176 | -3.30 | b <sub>1</sub> |  |
|     |      | HOMO-1 | -0.135016 | -3.67 | b <sub>2</sub> |  |
|     |      | HOMO-2 | -0.161300 | -4.39 | a <sub>1</sub> |  |

**Table S13. (continued)**

|     |      |        |           |       |       |                                                                                     |
|-----|------|--------|-----------|-------|-------|-------------------------------------------------------------------------------------|
| 1.0 | 0.00 | HOMO   | -0.125571 | -3.42 | $b_1$ | 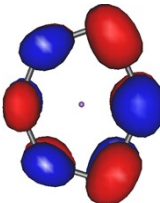 |
|     |      | HOMO-1 | -0.139003 | -3.78 | $b_2$ |  |
|     |      | HOMO-2 | -0.171314 | -4.66 | $a_1$ |  |



**Table S14. The HOMO, HOMO-1, HOMO-2 of the state  $2^1A_1$  of  $\text{Li}@C_{12}^-$  changes along  $q_1$  mode in  $C_{2v}$  symmetry ( $17a_1+4b_1+14b_2+3a_2$ ) at HF/cc-pVTZ level.**

| $q_1$ | Relative energy (eV) | Orbital | Orbital energy (a.u.) | Orbital energies (eV) | Symbol | Orbital images                                                                        |
|-------|----------------------|---------|-----------------------|-----------------------|--------|---------------------------------------------------------------------------------------|
| 0.0   | 1.09                 | HOMO    | -0.058182             | -1.58                 | $b_1$  | 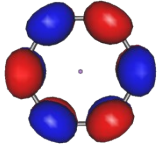   |
|       |                      | HOMO-1  | -0.104108             | -2.83                 | $a_2$  |    |
|       |                      | HOMO-2  | -0.115066             | -3.13                 | $b_2$  |  |
| 0.1   | 1.13                 | HOMO    | -0.065161             | -1.77                 | $b_1$  |  |
|       |                      | HOMO-1  | -0.098874             | -2.69                 | $a_2$  |  |
|       |                      | HOMO-2  | -0.110453             | -3.01                 | $b_2$  |  |

**Table S14. (continued)**

|     |      |        |           |       |       |                                                                                       |
|-----|------|--------|-----------|-------|-------|---------------------------------------------------------------------------------------|
| 0.2 | 1.26 | HOMO   | -0.072160 | -1.96 | $b_1$ | 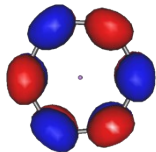   |
|     |      | HOMO-1 | -0.093989 | -2.56 | $a_2$ |    |
|     |      | HOMO-2 | -0.106568 | -2.90 | $b_2$ |    |
| 0.3 | 1.46 | HOMO   | -0.078999 | -2.15 | $b_1$ |   |
|     |      | HOMO-1 | -0.089339 | -2.43 | $a_2$ |  |
|     |      | HOMO-2 | -0.103511 | -2.82 | $b_2$ |  |
| 0.4 | 1.72 | HOMO   | -0.084815 | -2.31 | $b_2$ |  |
|     |      | HOMO-1 | -0.085507 | -2.33 | $b_1$ |  |

**Table S14. (continued)**

|     |      |        |           |       |       |                                                                                       |
|-----|------|--------|-----------|-------|-------|---------------------------------------------------------------------------------------|
| 0.4 | 1.72 | HOMO-2 | -0.101375 | -2.76 | $a_2$ | 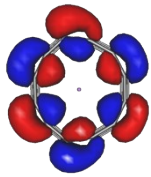   |
| 0.5 | 2.04 | HOMO   | -0.080324 | -2.73 | $a_2$ |    |
|     |      | HOMO-1 | -0.091561 | -2.49 | $b_1$ |    |
|     |      | HOMO-2 | -0.080324 | -2.19 | $b_2$ |   |
| 0.6 | 2.41 | HOMO   | -0.075776 | -2.72 | $a_2$ |  |
|     |      | HOMO-1 | -0.097121 | -2.64 | $b_1$ |  |
|     |      | HOMO-2 | -0.100040 | -2.06 | $b_2$ |  |
| 0.7 | 2.85 | HOMO   | -0.071069 | -1.93 | $a_2$ |  |

**Table S14. (continued)**

|     |      |        |           |       |       |                                                                                       |
|-----|------|--------|-----------|-------|-------|---------------------------------------------------------------------------------------|
| 0.7 | 2.85 | HOMO-1 | -0.100716 | -2.74 | $b_2$ | 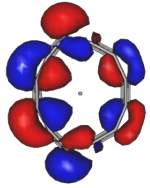   |
|     |      | HOMO-2 | -0.102246 | -2.78 | $b_1$ |    |
| 0.8 | 3.35 | HOMO   | -0.107065 | -1.80 | $a_2$ |    |
|     |      | HOMO-1 | -0.102002 | -2.78 | $b_2$ |   |
|     |      | HOMO-2 | -0.066099 | -2.91 | $b_1$ |  |
| 0.9 | 3.93 | HOMO   | -0.060773 | -1.65 | $a_2$ |  |
|     |      | HOMO-1 | -0.103538 | -2.82 | $b_2$ |  |
|     |      | HOMO-2 | -0.111733 | -3.04 | $b_1$ |  |

**Table S14. (continued)**

|     |      |        |           |       |       |                                                                                     |
|-----|------|--------|-----------|-------|-------|-------------------------------------------------------------------------------------|
| 1.0 | 4.61 | HOMO   | -0.055037 | -1.50 | $a_2$ | 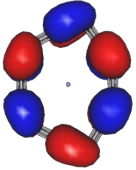 |
|     |      | HOMO-1 | -0.104879 | -2.85 | $b_2$ |  |
|     |      | HOMO-2 | -0.116402 | -3.17 | $b_1$ |  |

**Table S15. The HOMO, HOMO-1, HOMO-2 of the state  $3^1A_1$  of  $Li@C_{12}^-$  changes along  $q_1$  mode in  $C_{2v}$  symmetry ( $18a_1+3b_1+14b_2+3a_2$ ) at HF/cc-pVTZ level.**

| $q_1$ | Relative energy (eV) | Orbital | Orbital energy (a.u.) | Orbital energies (eV) | Symbol | Orbital images                                                                        |
|-------|----------------------|---------|-----------------------|-----------------------|--------|---------------------------------------------------------------------------------------|
| 0     | 1.19                 | HOMO    | -0.057425             | -1.56                 | $a_1$  | 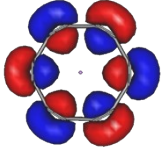   |
|       |                      | HOMO-1  | -0.102411             | -2.79                 | $b_2$  |   |
|       |                      | HOMO-2  | -0.126551             | -3.44                 | $a_2$  |  |
| 0.1   | 1.20                 | HOMO    | -0.067066             | -1.82                 | $a_1$  |  |
|       |                      | HOMO-1  | -0.099954             | -2.72                 | $b_2$  |  |
|       |                      | HOMO-2  | -0.121271             | -3.30                 | $a_2$  |  |

**Table S15. (continued)**

|     |      |        |           |       |                |                                                                                       |
|-----|------|--------|-----------|-------|----------------|---------------------------------------------------------------------------------------|
| 0.2 | 1.22 | HOMO   | -0.080215 | -2.18 | a <sub>1</sub> | 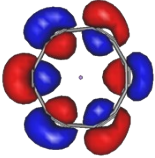   |
|     |      | HOMO-1 | -0.101581 | -2.76 | b <sub>2</sub> |    |
|     |      | HOMO-2 | -0.116189 | -3.16 | a <sub>2</sub> |    |
| 0.3 | 1.24 | HOMO   | -0.094234 | -2.56 | a <sub>1</sub> |   |
|     |      | HOMO-1 | -0.105163 | -2.86 | b <sub>2</sub> |  |
|     |      | HOMO-2 | -0.111225 | -3.03 | a <sub>2</sub> |  |
| 0.4 | 1.27 | HOMO   | -0.106166 | -2.89 | a <sub>2</sub> |  |
|     |      | HOMO-1 | -0.108092 | -2.94 | a <sub>1</sub> |  |

**Table S15. (continued)**

|     |      |        |           |       |       |                                                                                       |
|-----|------|--------|-----------|-------|-------|---------------------------------------------------------------------------------------|
| 0.4 | 1.27 | HOMO-2 | -0.109895 | -2.99 | $b_2$ | 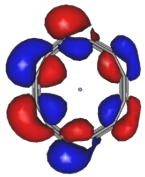   |
| 0.5 | 1.33 | HOMO   | -0.100845 | -2.74 | $a_2$ |    |
|     |      | HOMO-1 | -0.115384 | -3.14 | $b_2$ |    |
|     |      | HOMO-2 | -0.121402 | -3.30 | $a_1$ |   |
|     |      | HOMO   | -0.095159 | -2.59 | $a_2$ |  |
| 0.6 | 1.42 | HOMO-1 | -0.121315 | -3.30 | $b_2$ |  |
|     |      | HOMO-2 | -0.134034 | -3.65 | $a_1$ |  |
|     |      | HOMO   | -0.089052 | -2.42 | $a_2$ |  |
| 0.7 | 1.57 | HOMO   | -0.089052 | -2.42 | $a_2$ |  |



**Table S15. (continued)**

|     |      |        |           |       |                |                                                                                       |
|-----|------|--------|-----------|-------|----------------|---------------------------------------------------------------------------------------|
| 0.7 | 1.57 | HOMO-1 | -0.127370 | -3.47 | b <sub>2</sub> | 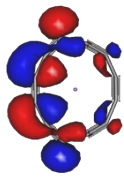   |
|     |      | HOMO-2 | -0.145988 | -3.97 | a <sub>1</sub> |    |
| 0.8 | 1.78 | HOMO   | -0.082501 | -2.24 | a <sub>2</sub> |    |
|     |      | HOMO-1 | -0.133221 | -3.63 | b <sub>2</sub> |   |
|     |      | HOMO-2 | -0.157323 | -4.28 | a <sub>1</sub> |  |
| 0.9 | 2.09 | HOMO   | -0.075495 | -2.05 | a <sub>2</sub> |  |
|     |      | HOMO-1 | -0.138517 | -3.77 | b <sub>2</sub> |  |
|     |      | HOMO-2 | -0.168118 | -4.57 | a <sub>1</sub> |  |

**Table S15. (continued)**

|   |      |        |           |       |                |                                                                                     |
|---|------|--------|-----------|-------|----------------|-------------------------------------------------------------------------------------|
| 1 | 2.51 | HOMO   | -0.068038 | -1.85 | a <sub>2</sub> | 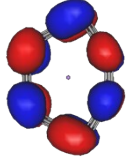 |
|   |      | HOMO-1 | -0.142878 | -3.89 | b <sub>2</sub> |  |
|   |      | HOMO-2 | -0.178451 | -4.86 | a <sub>1</sub> |  |

**Table S16. The HOMO, HOMO-1, HOMO-2 of the doubly-excited state (green curve in Figure 3 of the main text) changes along  $q_2$  mode in  $C_{2h}$  symmetry ( $16a_g+3a_u+15b_u+4b_g$ ) at HF/cc-pVTZ level.**

| $q_2$ | Relative energy (eV) | Orbital | Orbital energy (a.u.) | Orbital energies (eV) | Symbol | Orbital images                                                                        |
|-------|----------------------|---------|-----------------------|-----------------------|--------|---------------------------------------------------------------------------------------|
| 0     | 1.09                 | HOMO    | -0.058182             | -1.58                 | $b_g$  | 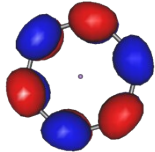   |
|       |                      | HOMO-1  | -0.104108             | -2.83                 | $b_g$  |   |
|       |                      | HOMO-2  | -0.115066             | -3.13                 | $b_u$  |  |
| 0.1   | 1.09                 | HOMO    | -0.060666             | -1.65                 | $b_g$  |  |
|       |                      | HOMO-1  | -0.101947             | -2.77                 | $b_g$  |  |
|       |                      | HOMO-2  | -0.112917             | -3.07                 | $b_u$  |  |

**Table S16. (continued)**

|     |      |        |           |       |       |                                                                                       |
|-----|------|--------|-----------|-------|-------|---------------------------------------------------------------------------------------|
| 0.2 | 1.10 | HOMO   | -0.062198 | -1.69 | $b_g$ | 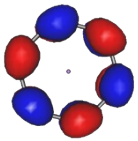   |
|     |      | HOMO-1 | -0.101427 | -2.76 | $b_g$ |    |
|     |      | HOMO-2 | -0.111867 | -3.04 | $b_u$ |    |
| 0.3 | 1.12 | HOMO   | -0.062780 | -1.71 | $b_g$ |   |
|     |      | HOMO-1 | -0.102436 | -2.79 | $b_g$ |  |
|     |      | HOMO-2 | -0.112083 | -3.05 | $b_u$ |  |
| 0.4 | 1.13 | HOMO   | -0.063085 | -1.72 | $b_g$ |  |
|     |      | HOMO-1 | -0.103983 | -2.83 | $b_g$ |  |

**Table S16. (continued)**

|     |      |        |           |       |       |                                                                                       |
|-----|------|--------|-----------|-------|-------|---------------------------------------------------------------------------------------|
| 0.4 | 1.13 | HOMO-2 | -0.113608 | -3.09 | $b_u$ | 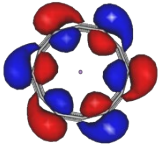   |
| 0.5 | 1.14 | HOMO   | -0.063718 | -1.73 | $b_g$ |    |
|     |      | HOMO-1 | -0.105118 | -2.86 | $b_g$ |    |
|     |      | HOMO-2 | -0.116304 | -3.16 | $b_u$ |   |
| 0.6 | 1.13 | HOMO   | -0.064795 | -1.76 | $b_g$ |  |
|     |      | HOMO-1 | -0.105545 | -2.87 | $b_g$ |  |
|     |      | HOMO-2 | -0.119900 | -3.26 | $b_u$ |  |
| 0.7 | 1.10 | HOMO   | -0.066144 | -1.80 | $b_g$ |  |

**Table S16. (continued)**

|     |      |        |           |       |       |                                                                                       |
|-----|------|--------|-----------|-------|-------|---------------------------------------------------------------------------------------|
| 0.7 | 1.10 | HOMO-1 | -0.105413 | -2.87 | $b_g$ | 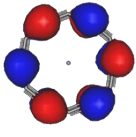   |
|     |      | HOMO-2 | -0.124108 | -3.38 | $b_u$ |    |
| 0.8 | 1.06 | HOMO   | -0.067548 | -1.84 | $b_g$ |    |
|     |      | HOMO-1 | -0.104985 | -2.86 | $b_g$ |   |
|     |      | HOMO-2 | -0.128699 | -3.50 | $b_u$ |  |
| 0.9 | 1.03 | HOMO   | -0.068826 | -1.87 | $b_g$ |  |
|     |      | HOMO-1 | -0.104490 | -2.84 | $b_g$ |  |
|     |      | HOMO-2 | -0.133516 | -3.63 | $b_u$ |  |

**Table S16. (continued)**

|   |      |        |           |       |       |                                                                                     |
|---|------|--------|-----------|-------|-------|-------------------------------------------------------------------------------------|
| 1 | 1.02 | HOMO   | -0.069839 | -1.90 | $b_g$ | 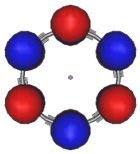 |
|   |      | HOMO-1 | -0.104105 | -2.83 | $b_g$ |  |
|   |      | HOMO-2 | -0.138452 | -3.77 | $b_u$ |  |

**Table S17. The HOMO, HOMO-1, HOMO-2 of the doubly-excited state (blue curve in Figure 3 of the main text) of  $\text{Li}@\text{C}_{12}^-$  changes along  $q_2$  mode in  $\text{C}_{2h}$  symmetry ( $16a_g+3a_u+16b_u+3b_g$ ) at HF/cc-pVTZ level.**

| $q_2$ | Relative energy (eV) | Orbital | Orbital energy (a.u.) | Orbital energies (eV) | Symbol | Orbital images                                                                        |
|-------|----------------------|---------|-----------------------|-----------------------|--------|---------------------------------------------------------------------------------------|
| 0.0   | 1.19                 | HOMO    | -0.057425             | -1.56                 | $b_u$  | 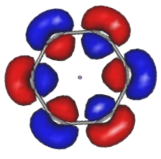   |
|       |                      | HOMO-1  | -0.102411             | -2.79                 | $b_u$  |    |
|       |                      | HOMO-2  | -0.126551             | -3.44                 | $b_g$  |  |
| 0.1   | 1.21                 | HOMO    | -0.059706             | -1.62                 | $b_u$  |  |
|       |                      | HOMO-1  | -0.100126             | -2.72                 | $b_u$  |  |
|       |                      | HOMO-2  | -0.123866             | -3.37                 | $b_g$  |  |



**Table 17. (continued)**

|     |      |        |           |       |       |                                                                                       |
|-----|------|--------|-----------|-------|-------|---------------------------------------------------------------------------------------|
| 0.2 | 1.25 | HOMO   | -0.060946 | -1.66 | $b_u$ | 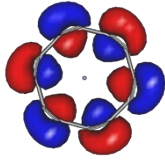   |
|     |      | HOMO-1 | -0.099046 | -2.70 | $b_u$ |    |
|     |      | HOMO-2 | -0.121170 | -3.30 | $b_g$ |    |
| 0.3 | 1.32 | HOMO   | -0.061014 | -1.66 | $b_u$ |   |
|     |      | HOMO-1 | -0.099302 | -2.70 | $b_u$ |  |
|     |      | HOMO-2 | -0.118468 | -3.22 | $b_g$ |  |
| 0.4 | 1.42 | HOMO   | -0.060071 | -1.63 | $b_u$ |  |
|     |      | HOMO-1 | -0.100730 | -2.74 | $b_u$ |  |

**Table S17. (continued)**

|     |      |        |           |       |       |                                                                                       |
|-----|------|--------|-----------|-------|-------|---------------------------------------------------------------------------------------|
| 0.4 | 1.42 | HOMO-2 | -0.115765 | -3.15 | $b_g$ | 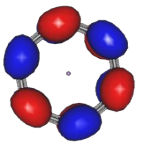   |
| 0.5 | 1.54 | HOMO   | -0.058528 | -1.59 | $b_u$ |    |
|     |      | HOMO-1 | -0.102926 | -2.80 | $b_u$ |    |
|     |      | HOMO-2 | -0.113069 | -3.08 | $b_g$ |   |
| 0.6 | 1.69 | HOMO   | -0.056908 | -1.55 | $b_u$ |  |
|     |      | HOMO-1 | -0.105373 | -2.87 | $b_u$ |  |
|     |      | HOMO-2 | -0.110394 | -3.00 | $b_g$ |  |

|     |      |      |           |       |       |                                                                                     |
|-----|------|------|-----------|-------|-------|-------------------------------------------------------------------------------------|
| 0.7 | 1.87 | HOMO | -0.055831 | -1.52 | $b_u$ | 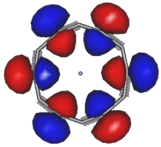 |
|-----|------|------|-----------|-------|-------|-------------------------------------------------------------------------------------|

**Table S17. (continued)**

|     |      |        |           |       |       |                                                                                       |
|-----|------|--------|-----------|-------|-------|---------------------------------------------------------------------------------------|
| 0.7 | 1.87 | HOMO-1 | -0.107476 | -2.92 | $b_u$ | 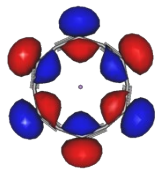   |
|     |      | HOMO-2 | -0.107762 | -2.93 | $b_g$ |    |
| 0.8 | 2.07 | HOMO   | -0.056098 | -1.53 | $b_u$ |   |
|     |      | HOMO-1 | -0.105231 | -2.86 | $b_g$ |  |
|     |      | HOMO-2 | -0.108472 | -2.95 | $b_u$ |  |
| 0.9 | 2.29 | HOMO   | -0.058271 | 1.59  | $b_u$ |  |
|     |      | HOMO-1 | -0.103023 | -2.80 | $b_g$ |  |

|  |  |        |           |       |       |                                                                                     |
|--|--|--------|-----------|-------|-------|-------------------------------------------------------------------------------------|
|  |  | HOMO-2 | -0.107828 | -2.93 | $b_u$ | 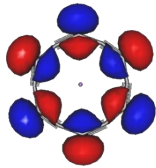 |
|--|--|--------|-----------|-------|-------|-------------------------------------------------------------------------------------|

### S9. CASSCF calculations on the ground and excited states of $\text{Li}@C_{12}^-$ in $C_{2v}$ symmetry

In the main text, our calculations are based on the single-reference CCSD and EOM-CCSD methods. To better understand the situation, it is relevant to check the amount of the multi-configurational character of the electronic states involved. We employed the state-averaged complete active space self-consistent field (CASSCF) method using the MOLPRO software package,<sup>[10]</sup> which is a good tool to study multi-configurational effects.

We ran the CASSCF (6e, 8o) with eight active orbitals (orbital 36-43 in Table S5) and six active electrons, and calculated 20 states at the equilibrium geometry of the ground state of  $\text{Li}@C_{12}^-$  in  $C_{2v}$  symmetry. The results are shown in Table S18. The ground and doubly-excited states  $1^1A_1$ ,  $2^1A_1$  and  $3^1A_1$  were found among these 10 states. All three states are found to be mainly dominated by a single reference as indicated by the leading coefficient 0.959 ( $1^1A_1$ ), 0.820 ( $2^1A_1$ ), 0.916 ( $3^1A_1$ ). The

single-reference character justifies the use of the CCSD and EOM-CCSD methods employed in this work.

**Table S18. Coefficient of the CI vector of the  $1^1A_1$ ,  $2^1A_1$ , and  $3^1A_1$  states calculated by CAS (6,8). The leading coefficients of states  $1^1A_1$ ,  $2^1A_1$ , and  $3^1A_1$  are marked in Bold.**

|                            | Coefficient  |              |        |        |        |              |        |
|----------------------------|--------------|--------------|--------|--------|--------|--------------|--------|
| <b><math>1^1A_1</math></b> | <b>0.959</b> | -0.017       | 0.009  | 0.158  | -0.010 | 0.012        | 0.035  |
|                            | -0.016       | -0.002       | -0.003 | 0.004  | -0.078 | 0.015        | 0.001  |
|                            | 0.049        | 0.001        | -0.018 | -0.001 | 0.002  | -0.008       |        |
| <b><math>2^1A_1</math></b> | -0.006       | -0.274       | -0.007 | -0.126 | -0.004 | 0.007        | -0.006 |
|                            | -0.004       | 0.003        | -0.004 | -0.027 | -0.012 | <b>0.820</b> | 0.029  |
|                            | 0.089        | -0.001       | -0.005 | 0.047  | -0.002 | -0.145       |        |
| <b><math>3^1A_1</math></b> | -0.031       | <b>0.916</b> | 0.015  | 0.244  | 0.016  | -0.016       | 0.015  |
|                            | 0.012        | 0.001        | 0.002  | -0.009 | -0.002 | 0.247        | 0.005  |
|                            | 0.032        | -0.001       | -0.004 | 0.009  | -0.001 | -0.013       |        |

## References

- [1] K. Kaiser, L. M. Scriven, F. Schulz, P. Gawel, L. Gross, and H. L. Anderson. An sp-hybridized molecular carbon allotrope, cyclo [18] carbon. *Science*, 2019, **365**, 1299.
- [2] L. H. Anderson, C. W. Patrick, L. M. Scriven, and S. L. Woltering. A short history of cyclocarbons. *Bull. Chem. Soc. Jpn*, 2021, **94**, 798.
- [3] H. Prinzbach, A. Weiler, P. Landenberger, F. Wahl, J. Wörth, L. T. Scott, M. Gelmont, D. Olevano and B. v. Issendorff. Gas-phase production and photoelectron spectroscopy of the smallest fullerene, C<sub>20</sub>. *Nature*, 2000, **407**, 60.
- [4] G. D. Purvis III, and R. J. Bartlett, A full coupled-cluster singles and doubles model: The inclusion of disconnected triples, *J. Chem. Phys.* 1982, **76**, 1910.
- [5] T. H. Dunning, Jr, Gaussian basis sets for use in correlated molecular calculations. i. The atoms boron through neon and hydrogen, *J. Chem. Phys.* 1989, **90**, 1007.
- [6] B. P. Prascher, D. E. Won, K. A. Peterson, T. H. Dunning, and A. K. Wilson, Gaussian basis sets for use in correlated molecular calculations. VI. Valence, core-valence, and scalar relativistic basis sets for Li, Be, Na, and Mg, *Theor. Chem. Acc.* 2011, **128**, 69.
- [7] M. Nooijen, and R. J. Bartlett R J. Equation of motion coupled cluster method for electron attachment[J]. *J. Chem. Phys.* 1995, **102**, 3629.
- [8] D. A. Matthews, L. Cheng, M. E. Harding, F. Lipparini, S. Stopkowicz, T.-C. Jagau, P. G. Szalay, J. Gauss, and J. F. Stanton, Coupled-cluster techniques in computational chemistry: The CFOUR program package, *J. Chem. Phys.* 2020, **152**, 214108.
- [9] Y.-F. Yang and L. S. Cederbaum. Endocircular Li Carbon Rings. *Angew. Chem. Int. Ed.*, 2021, **60**,16649; *Angew. Chem.* 2021, **133**, 16785.
- [10] H.-J. Werner, P. J. Knowles, G. Knizia, F. R. Manby, and M. Schutz, WIREs. Comput. Mol. Sci. 2012, 2, 242–253
